# Supplementary material for: Battling the known unknowns: a synoptic review of aquatic plastics research from Australia, the United Kingdom and China
Source: Royal Society of Chemistry journal article supplement (doi:10.1039/d1em00175b), 2021-01-01
Supplement: d1em00175b1.pdf [file d1em00175b1.pdf]

**Supporting Information, Table S1. Literature used in the review, organised by country and level 1 category. The level 2 category, sub-topic and keywords for each paper are also listed.**

| Reference (by Country and Level 1 category)                                                                                                                                                                                                                      | Level 2 category | Sub-topic  | Keywords                                                                                            |
|------------------------------------------------------------------------------------------------------------------------------------------------------------------------------------------------------------------------------------------------------------------|------------------|------------|-----------------------------------------------------------------------------------------------------|
| <b>Australia</b>                                                                                                                                                                                                                                                 |                  |            |                                                                                                     |
| <b><u>Culture Sustainability Future</u></b>                                                                                                                                                                                                                      |                  |            |                                                                                                     |
| Dalton SJ, Smith SDA. 2009. A Review of Underwater Volunteer Groups in NSW.                                                                                                                                                                                      | Review           | Governance | no keywords listed                                                                                  |
| Great Barrier Reef Marine Park Authority. 2018. Position statement Marine debris.                                                                                                                                                                                | Governance       | Management | no keywords listed                                                                                  |
| Hardesty BD, Polidoro B, Compa M, Shim WJ, Widianarko B, Wilcox C. 2019. Multiple approaches to assessing the risk posed by anthropogenic plastic debris. <i>Marine Pollution Bulletin</i> 141: 188–193.                                                         | Governance       | Management | ecosystem impact; pollution; mortality; risk management; precautionary principle; sub-lethal impact |
| Hardesty BD, Wilcox C. 2011. Understanding the types, sources, and at-sea distribution of marine debris in Australian waters. CSIRO.                                                                                                                             | Governance       | Management | no keywords listed                                                                                  |
| Hardesty BD, Wilcox C. 2017. A risk framework for tackling marine debris. <i>Analytical Methods</i> 9: 1429–1436                                                                                                                                                 | Governance       | Management | no keywords listed                                                                                  |
| Hardesty BD, Willis K, Schuyler Q, Lawson T, Wilcox C. 2017b. Emerging Priorities Project - EP1 reducing the levels of plastics entering Australia's marine environment. Report to the National Environmental Science Programme, Marine Biodiversity Hub. CSIRO. | Governance       | Management | no keywords listed                                                                                  |
| Maguire R, Johnson H, Taboada MB, Barner L, Caldwell GA. 2019. A review of Single-use Plastic Waste Policy in 2018: What will 2019 hold in store? Faculty of Law Blog, Queensland University of Technology                                                       | Governance       | Governance | no keywords listed                                                                                  |
| Mellish S, Pearson EL, Sanders B, Litchfield CA. 2016. Marine wildlife entanglement and the Seal the Loop initiative: a comparison of two free-choice learning approaches on visitor knowledge, attitudes and conservation                                       | Governance       | Knowledge  | conservation behaviour; conservation education; free-choice learning; marine debris;                |

|                                                                                                                                                                                                                                                                                  |            |            |                                                                                                                                 |
|----------------------------------------------------------------------------------------------------------------------------------------------------------------------------------------------------------------------------------------------------------------------------------|------------|------------|---------------------------------------------------------------------------------------------------------------------------------|
| behaviour. International Zoo Yearbook 50: 129–154.                                                                                                                                                                                                                               |            |            | marine wildlife entanglement;<br>seal the loop initiative; zoos<br>and aquariums                                                |
| O'Farrell K. 2019. 2017-18 Australian Plastics Recycling Survey. National report. 1–48.                                                                                                                                                                                          | Governance | Action     | no keywords listed                                                                                                              |
| Schuyler Q, Hardesty BD, Lawson TJ, Opie K, Wilcox C. 2018. Economic incentives reduce plastic inputs to the ocean. Marine Policy 96: 250–255.                                                                                                                                   | Governance | Economics  | no keywords listed                                                                                                              |
| Smith SDA, Rule MJ, Harrison M, Dalton SJ. 2008. Monitoring the sea change: Preliminary assessment of the conservation value of nearshore reefs, and existing impacts, in a high-growth, coastal region of subtropical eastern Australia. Marine Pollution Bulletin 56: 525–534. | Governance | Knowledge  | human impact; shallow reef;<br>molluscs; fish; marine debris;<br>sampling protocol                                              |
| Vince J, Hardesty BD. 2017. Plastic pollution challenges in marine and coastal environments : from local to global governance. Restoration Ecology 25: 123–128.                                                                                                                  | Governance | Governance | community engagement;<br>corporate social responsibility;<br>litter<br>chemical contamination;<br>elicitation survey;           |
| Wilcox C, Mallos NJ, Leonard GH, Rodriguez A, Hardesty BD. 2016. Using expert elicitation to estimate the impacts of plastic pollution on marine wildlife. Marine Policy 65: 107–114.                                                                                            | Governance | Governance | entanglement; ingestion;<br>marine debris; marine mammal;<br>plastic pollution; seabird; turtle<br>abatement campaigns; litter; |
| Willis K, Maureaud C, Wilcox C, Hardesty BD. 2018. How successful are waste abatement campaigns and government policies at reducing plastic waste into the marine environment?. Marine Policy 96: 243–249.                                                                       | Governance | Knowledge  | policy; local government; waste<br>effectiveness                                                                                |

### **Environmental Interaction Impact**

|                                                                                                                                                                                                                                          |        |      |                                                                                                |
|------------------------------------------------------------------------------------------------------------------------------------------------------------------------------------------------------------------------------------------|--------|------|------------------------------------------------------------------------------------------------|
| Acampora H, Schuyler QA, Townsend KA, Hardesty BD. 2014. Comparing plastic ingestion in juvenile and adult stranded short-tailed shearwaters ( <i>Puffinus tenuirostris</i> ) in eastern Australia. Marine Pollution Bulletin 78: 63–68. | Biota  | Bird | ingestion; marine debris;<br>plastic– <i>Puffinus tenuirostris</i> ;<br>surface trawl sampling |
| Broadhurst MK, Millar RB. 2017. Reducing the marine debris of recreational hoop nets in south-eastern Australia. Marine Pollution Bulletin 119: 40–47.                                                                                   | Biota  | Nets | no keywords listed                                                                             |
| Butterworth A. 2016. A review of the welfare impact on pinnipeds of plastic marine debris. Frontiers in Marine Science 3: 1–10.                                                                                                          | Review | Seal | no keywords listed                                                                             |
| Cannon SME, Lavers JL, Figueiredo B. 2016. Plastic ingestion by fish in the Southern Hemisphere: A baseline study and review of methods. Marine                                                                                          | Review | Fish | Actinopterygii; Australia;<br><i>Dissostichus mawsoni</i> ; FTIR;                              |

|                                                                                                                                                                                                                                                                                |            |                |                                                                                                                                              |
|--------------------------------------------------------------------------------------------------------------------------------------------------------------------------------------------------------------------------------------------------------------------------------|------------|----------------|----------------------------------------------------------------------------------------------------------------------------------------------|
| Pollution Bulletin 107: 286–291.                                                                                                                                                                                                                                               |            |                | plastic pollution; southern ocean                                                                                                            |
| Carey MJ. 2011. Intergenerational transfer of plastic debris by Short-tailed Shearwaters ( <i>Ardenna tenuirostris</i> ). <i>Emu</i> 111: 229–234.                                                                                                                             | Biota      | Bird           | plastic pollution; marine debris; seabirds; shearwater                                                                                       |
| Caron AGM, Thomas CR, Berry KLE, Motti CA, Ariel E, Brodie JE. 2018. Ingestion of Microplastic debris by green sea turtles ( <i>Chelonia mydas</i> ) in the Great Barrier Reef: Validation of a sequential extraction protocol. <i>Marine Pollution Bulletin</i> 127: 743–751. | Biota      | Turtle         | marine turtle; plastic ingestion; plastic contamination; extraction technique; chemical digestion; Fourier transformed infrared spectroscopy |
| Ceccarelli D. 2009. Impacts of plastic debris on Australian marine wildlife. Report by C&R Consulting for the Department of the Environment, Water, Heritage and the Arts.                                                                                                     | Review     | Fish           | no keywords listed                                                                                                                           |
| Cousin HR, Auman HJ, Alderman R, Virtue P. 2015. The frequency of ingested plastic debris and its effects on body condition of Short-tailed Shearwater ( <i>Puffinus tenuirostris</i> ) pre-fledging chicks in Tasmania, Australia. <i>Emu</i> 115: 6–11.                      | Biota      | Bird           | industrial plastic; marine debris; nurdles; plastic colour; plastic pollution; user plastic                                                  |
| Critchell K, Hamann M, Wildermann N, Grech A. 2019. Predicting the exposure of coastal species to plastic pollution in a complex island archipelago. <i>Environmental Pollution</i> 252: 982–991.                                                                              | Substrate  | Reef           | dispersal modelling; macroplastics; microplastics; coral reefs; marine turtles; mangroves                                                    |
| DEWHA. 2009. Background paper for the threat abatement plan for the impacts of marine debris on vertebrate marine life. Department of the Environment, Water, Heritage and the Arts. Canberra.                                                                                 | Governance | Governance     | no keywords listed                                                                                                                           |
| Edyvane KS, Penny SS. 2017. Trends in derelict fishing nets and fishing activity in northern Australia: Implications for trans-boundary fisheries management in the shared Arafura and Timor Seas. <i>Fisheries Research</i> 188: 23–37.                                       | Effect     | Nets           | fishing debris; IUU fishing; food security; Arafura and Timor seas; trans-boundary pollution; regional fisheries management                  |
| Evans K, Hindell MA. 2004. The diet of sperm whales ( <i>Physeter macrocephalus</i> ) in southern Australian waters. <i>ICES Journal of Marine Science</i> 61: 1313–1329.                                                                                                      | Biota      | Marine Mammals | Australia; cephalopod; diet; mass stranding; <i>Physeter macrocephalus</i> ; southern ocean; sperm whale                                     |
| Gilbert JM, Reichelt-Brushett AJ, Bowling AC, Christidis L. 2016. Plastic ingestion in marine and coastal bird species of Southeastern Australia. <i>Marine</i>                                                                                                                | Biota      | Bird spp.      | Australia; seabirds; coastal birds; shearwaters; marine                                                                                      |

|                                                                                                                                                                                                                                                                                          |        |           |                                                                                                                                                                                   |
|------------------------------------------------------------------------------------------------------------------------------------------------------------------------------------------------------------------------------------------------------------------------------------------|--------|-----------|-----------------------------------------------------------------------------------------------------------------------------------------------------------------------------------|
| Ornithology 44: 21–26.                                                                                                                                                                                                                                                                   |        |           |                                                                                                                                                                                   |
| Gunn R, Hardesty BD, Butler J. 2010. Tackling ‘ghost nets’: Local solutions to a global issue in northern Australia. <i>Ecological Management and Restoration</i> 11: 88–98.                                                                                                             | Effect | Nets      | pollution; plastic ingestion<br>derelict fishing nets; ghostnet gear; indigenous livelihoods; marine debris; threatened species management.                                       |
| Hall NM, Berry KLE, Rintoul L, Hoogenboom MO. 2015. Microplastic ingestion by scleractinian corals. <i>Marine Biology</i> 162: 725–732.                                                                                                                                                  | Biota  | Coral     | no keywords listed                                                                                                                                                                |
| Halstead JE, Smith JA, Carter EA, Lay PA, Johnston EL. 2018. Assessment tools for Microplastics and natural fibres ingested by fish in an urbanised estuary. <i>Environmental Pollution</i> 234: 552–561.                                                                                | Biota  | Fish      | microplastic; <i>Acanthopagrus australis</i> ; yellowfin bream; <i>Mugil cephalus</i> ; sea mullet; <i>Gerres subfasciatus</i> ; silverbiddy; ingestion; vibrational spectroscopy |
| Hardesty BD, Holdsworth D, Revill AT, Wilcox C. 2015. A biochemical approach for identifying plastics exposure in live wildlife. <i>Methods in Ecology and Evolution</i> 6: 92–98.                                                                                                       | Biota  | Bird spp. | bis-phthalate; dibutyl phthalate; dimethyl phthalate; plastics; seabird; uropygial gland                                                                                          |
| Hutton I, Carlile N, Priddel D. 2008. Plastic ingestion by Flesh-footed Shearwaters, <i>Puffinus carneipes</i> , and Wedge-tailed Shearwaters, <i>Puffinus pacificus</i> . <i>Papers and Proceedings of the Royal Society of Tasmania</i> 142: 67–72.                                    | Biota  | Bird      | marine pollution; marine litter; Lord Howe Island; Wedge-tailed Shearwater; plastic ingestion; Flesh-footed Shearwater; <i>Puffinus carneipes</i> ; <i>Puffinus pacificus</i>     |
| Hutton I. 2004. Plastic perils for seabirds. <i>Nature Australia</i> 28: 52–59.                                                                                                                                                                                                          | Biota  | Bird spp. | plastics; shearwaters; marine ecology; ingestion                                                                                                                                  |
| Jahan S, Strezov V, Weldekidan H, Kumar R, Kan T, Sarkodie SA, He J, Dastjerdi B, Wilson SP. 2019. Interrelationship of Microplastic pollution in sediments and oysters in a seaport environment of the eastern coast of Australia. <i>Science of The Total Environment</i> 695: 133924. | Biota  | Bivalve   | microplastics; sediment; seaport                                                                                                                                                  |
| Jones MM. 1995. Fishing debris in the Australian marine environment. <i>Marine Pollution Bulletin</i> 30: 25–33.                                                                                                                                                                         | Effect | Nets      | no keywords listed                                                                                                                                                                |
| Lavers JL, Bond AL, Hutton I. 2014. Plastic ingestion by flesh-footed shearwaters ( <i>Puffinus carneipes</i> ): Implications for fledgling body condition and the accumulation of plastic-derived chemicals. <i>Environmental Pollution</i>                                             | Biota  | Bird      | body condition; Flesh-footed Shearwater; marine debris; plastic ingestion; trace metals                                                                                           |

187: 124–129.

|                                                                                                                                                                                                                                               |           |                  |                                                                                                                   |
|-----------------------------------------------------------------------------------------------------------------------------------------------------------------------------------------------------------------------------------------------|-----------|------------------|-------------------------------------------------------------------------------------------------------------------|
| Lavers JL, Bond AL. 2016. Selectivity of flesh-footed shearwaters for plastic colour: Evidence for differential provisioning in adults and fledglings. <i>Marine Environmental Research</i> 113: 1–6.                                         | Biota     | Bird             | behaviour; colour preference; feeding; plastics; seabirds; selection                                              |
| Lavers JL, Dicks L, Dicks MR, Finger A. 2019. Significant plastic accumulation on the Cocos (Keeling) Islands, Australia. <i>Scientific Reports</i> 9: 1–9.                                                                                   | Substrate | Beach            | no keywords listed                                                                                                |
| Lavers JL, Hodgson JC, Clarke RH. 2013. Prevalence and composition of marine debris in Brown Booby ( <i>Sula leucogaster</i> ) nests at Ashmore Reef. <i>Marine Pollution Bulletin</i> 77: 320–324.                                           | Biota     | Bird             | Brown Booby; marine debris nesting; nesting ecology; plastic pollution; <i>Sula leucogaster</i> ; Timor sea       |
| Lavers JL, Hutton I, Bond AL. 2018. Ingestion of marine debris by Wedge-tailed Shearwaters ( <i>Ardenna pacifica</i> ) on Lord Howe Island, Australia during 2005–2018. <i>Marine Pollution Bulletin</i> 133: 616–621.                        | Biota     | Bird             | long-term trends; plastic ingestion; plastic pollution; Tasman Sea; Wedge-tailed Shearwater                       |
| Lavers JL, Hutton I, Bond AL. 2019. Clinical Pathology of Plastic Ingestion in Marine Birds and Relationships with Blood Chemistry. <i>Environmental Science &amp; Technology</i> 53: 9224–9231.                                              | Biota     | Bird             | no keywords listed                                                                                                |
| Lavers JL, Stivaktakis G, Hutton I, Bond AL. 2019c. Detection of ultrafine plastics ingested by seabirds using tissue digestion. <i>Marine Pollution Bulletin</i> 142: 470–474.                                                               | Biota     | Bird spp.        | extraction methods; marine debris; microplastic; plastic pollution                                                |
| Lavers JL. 2018. Population status and threats to Flesh-footed Shearwaters ( <i>Puffinus carneipes</i> ) in South and Western Australia. <i>Marine Science</i> 72: 316–327.                                                                   | Review    | Bird             | apex marine predator; cumulative mortality; flesh-footed shearwater; indicator species; <i>Puffinus carneipes</i> |
| Lawson TJ, Wilcox C, Johns K, Dann P, Hardesty BD. 2015. Characteristics of marine debris that entangle Australian fur seals ( <i>Arctocephalus pusillus doriferus</i> ) in southern Australia. <i>Marine Pollution Bulletin</i> 98: 354–357. | Biota     | Seal             | Australian fur seal; entanglement; marine debris; pinniped                                                        |
| McIntosh RR, Kirkwood R, Sutherland DR, Dann P. 2015. Drivers and annual estimates of marine wildlife entanglement rates: A long-term case study with Australian fur seals. <i>Marine Pollution Bulletin</i> 101: 716–725.                    | Biota     | Seal             | <i>Arctocephalus pusillus doriferus</i> ; fisheries interactions; marine debris; ghost nets; Otariid; plastic     |
| Miketa M, Krzyszczyk E, Mann J. 2017. Behavioral responses to fishing line entanglement of a juvenile bottlenose dolphin in Shark Bay, Australia.                                                                                             | Biota     | Dolphin/Porpoise | marine debris; human impacts; fishing gear                                                                        |

Matters 1–6.

|                                                                                                                                                                                                                                                                                                                                                                      |            |                 |                                                                                                        |
|----------------------------------------------------------------------------------------------------------------------------------------------------------------------------------------------------------------------------------------------------------------------------------------------------------------------------------------------------------------------|------------|-----------------|--------------------------------------------------------------------------------------------------------|
| O’Shea OR, Hamann M, Smith W, Taylor H. 2014. Predictable pollution: An assessment of weather balloons and associated impacts on the marine environment - An example for the Great Barrier Reef, Australia. <i>Marine Pollution Bulletin</i> 79: 61–68.                                                                                                              | Governance | Weather balloon | beach cleaning; dispersal modeling; latex; pollution; marine debris                                    |
| Page B, McKenzie J, McIntosh R, Baylis A, Morrissey A, Calvert N, Haase T, Berris M, Dowie D, Shaughnessy PD, Goldsworthy SD. 2004. Entanglement of Australian sea lions and New Zealand fur seals in lost fishing gear and other marine debris before and after Government and industry attempts to reduce the problem. <i>Marine Pollution Bulletin</i> 49: 33–42. | Biota      | Seal            | entanglement; fishing; plastic; marine debris; <i>Arctocephalus forsteri</i> ; <i>Neophoca cinerea</i> |
| Paterson HL, Dunlop JN. 2018. Minimal Plastic in Flesh-Footed Shearwater <i>Ardenna Carneipes</i> burrows at Southwestern Australia colonies. <i>Marine Ornithology</i> 167: 165–167.                                                                                                                                                                                | Biota      | Bird            | <i>Ardenna carneipes</i> ; burrows; Flesh-footed Shearwater; plastics; Southern Western Australia      |
| Pearson E, Mellish S, Sanders B, Litchfield C. 2014. Marine wildlife entanglement: Assessing knowledge, attitudes, and relevant behaviour in the Australian community. <i>Marine Pollution Bulletin</i> 89: 136–148.                                                                                                                                                 | Governance | Knowledge       | marine wildlife entanglement; marine debris; zoo education; conservation psychology                    |
| Pemberton D, Brothers NP, Kirkwood R. 1992. Entanglement of Australian fur seals in man-made debris in Tasmanian waters. <i>Wildlife Research</i> 19: 151–159.                                                                                                                                                                                                       | Biota      | Seal            | no keywords listed                                                                                     |
| Phillips C. 2017. Ghostly encounters: Dealing with ghost gear in the Gulf of Carpentaria. <i>Geoforum</i> 78: 33–42.                                                                                                                                                                                                                                                 | Review     | Nets            | encounter; waste; ghost fishing; ocean governance; northern Australia                                  |
| Priddel D, Carlile N, Fullagar P, Hutton I, O’Neill L. 2006. Decline in the distribution and abundance of flesh-footed shearwaters ( <i>Puffinus carneipes</i> ) on Lord Howe Island, Australia. <i>Biological Conservation</i> 128: 412–424.                                                                                                                        | Biota      | Bird            | burrow-nesting seabird; loss of nesting habitat; breeding success; Procellariiform; urbanisation       |
| Reid T, Hindell M, Lavers JL, Wilcox C. 2013. Re-Examining Mortality Sources and Population Trends in a Declining Seabird: Using Bayesian Methods to Incorporate Existing Information and New Data. <i>PLoS ONE</i> 8: 17–19.                                                                                                                                        | Review     | Bird            | no keywords listed                                                                                     |
| Reinhold L. 2015. Absence of Ingested Plastics in 20 Necropsied Sea Turtles in Western Australia <i>Marine Turtle Newsletter</i> 144: 13–15.                                                                                                                                                                                                                         | Biota      | Turtle          | no keywords listed                                                                                     |
| Roman L, Bell E, Wilcox C, Hardesty BD, Hindell M. 2019. Ecological drivers of                                                                                                                                                                                                                                                                                       | Biota      | Bird            | no keywords listed                                                                                     |

|                                                                                                                                                                                                                                                 |        |               |                                                                                                               |
|-------------------------------------------------------------------------------------------------------------------------------------------------------------------------------------------------------------------------------------------------|--------|---------------|---------------------------------------------------------------------------------------------------------------|
| marine debris ingestion in Procellariiform Seabirds. Scientific Reports 9: 1–8.                                                                                                                                                                 |        |               |                                                                                                               |
| Roman L, Hardesty BD, Hindell MA, Wilcox C. 2019. A quantitative analysis linking seabird mortality and marine debris ingestion. Scientific Reports 9: 1–7.                                                                                     | Biota  | Bird          | no keywords listed                                                                                            |
| Roman L, Paterson H, Townsend KA, Wilcox C, Hardesty BD, Hindell MA. 2019. Size of marine debris items ingested and retained by petrels. Marine Pollution Bulletin 142: 569–575.                                                                | Biota  | Bird          | diet; plastic ingestion; pollution; shearwater; seabird; Procellariiform                                      |
| Roman L, Schuyler QA, Hardesty BD, Townsend KA. 2016. Anthropogenic debris ingestion by avifauna in eastern Australia. PLoS ONE 11: 1–14.                                                                                                       | Biota  | Bird spp.     | no keywords listed                                                                                            |
| Schuyler Q, Wilcox C, Townsend K, Hardesty BD, Marshall NJ. 2014. Mistaken identity? Visual similarities of marine debris to natural prey items of sea turtles. BMC Ecology 14: 14.                                                             | Biota  | Turtle        | <i>Chelonia mydas</i> ; chromatic space; <i>Eretmochelys imbricata</i> ; marine debris; Vorobyev-Osorio model |
| Stoett P, Joanna V. 2019. The Plastic – Climate Nexus Linking Science, Policy, and Justice. Pages 345–361 in PG H, ed. Climate Change and Ocean Governance: Politics and Policy for Threatened Seas. Cambridge University Press.                | Review | Climate       | no keywords listed                                                                                            |
| van Franeker JA, Bell PJ. 1988. Plastic ingestion by petrels breeding in Antarctica. Marine Pollution Bulletin 19: 672–674.                                                                                                                     | Biota  | Bird          | no keywords listed                                                                                            |
| Verlis KM, Campbell ML, Wilson SP. 2013. Ingestion of marine debris plastic by the wedge-tailed shearwater <i>Ardenna pacifica</i> in the Great Barrier Reef, Australia. Marine Pollution Bulletin 72: 244–249.                                 | Biota  | Bird          | seabird; plastic pollution; bird health; environmental impacts; UNESCO world heritage site; chicks            |
| Verlis KM, Campbell ML, Wilson SP. 2014. Marine debris is selected as nesting material by the brown booby ( <i>Sula leucogaster</i> ) within the Swain Reefs, Great Barrier Reef, Australia. Marine Pollution Bulletin 87: 180–190.             | Biota  | Bird          | seabird; plastic pollution; threat; beach survey; environmental indicator                                     |
| Verlis KM, Campbell ML, Wilson SP. 2018. Seabirds and plastics don't mix: Examining the differences in marine plastic ingestion in wedge-tailed shearwater chicks at near-shore and offshore locations. Marine Pollution Bulletin 135: 852–861. | Biota  | Bird          | Australia; Great Barrier Reef; litter; marine debris; marine park; Procellariiform                            |
| Webb HK, Crawford RJ, Sawabe T, Ivanova EP. 2009. Poly(ethylene terephthalate) polymer surfaces as a substrate for bacterial attachment and biofilm formation. Microbes and Environments 24: 39–42.                                             | Biota  | Microorganism | bacterial attachment; biofilm; poly(ethylene terephthalate)                                                   |

|                                                                                                                                                                                                                                                                                                                                         |              |             |                                                                                                                             |
|-----------------------------------------------------------------------------------------------------------------------------------------------------------------------------------------------------------------------------------------------------------------------------------------------------------------------------------------|--------------|-------------|-----------------------------------------------------------------------------------------------------------------------------|
| Wilcox C, Puckridge M, Schuyler QA, Townsend K, Hardesty BD. 2018. A quantitative analysis linking sea turtle mortality and plastic debris ingestion. <i>Scientific Reports</i> 8: 1–11.                                                                                                                                                | Biota        | Turtle      | no keywords listed                                                                                                          |
| Yeo BG, Takada H, Taylor H, Ito M, Hosoda J, Allinson M, Connell S, Greaves L, McGrath J. 2015. POPs monitoring in Australia and New Zealand using plastic resin pellets, and International Pellet Watch as a tool for education and raising public awareness on plastic debris and POPs. <i>Marine Pollution Bulletin</i> 101: 137–145 | Contaminants | Chemicals   | PCBs; DDTs; HCHs; plastic; citizen science; science communication                                                           |
| Ziajahromi S, Kumar A, Neale PA, Leusch FDL. 2019. Effects of polyethylene Microplastics on the acute toxicity of a synthetic pyrethroid to midge larvae ( <i>Chironomus tepperi</i> ) in synthetic and river water. <i>Science of the Total Environment</i> 671: 971–975.                                                              | Biota        | Zooplankton | bifenthrin; organic matter; polyethylene microplastics; reduced toxicity; sorption                                          |
| <b><u>Societal Impacts</u></b>                                                                                                                                                                                                                                                                                                          |              |             |                                                                                                                             |
| Butler JRA, Gunn R, Berry HL, Wagey GA, Hardesty BD, Wilcox C. 2013. A Value Chain Analysis of ghost nets in the Arafura Sea: Identifying trans-boundary stakeholders, intervention points and livelihood trade-offs. <i>Journal of Environmental Management</i> 123: 14–25.                                                            | Effect       | Nets        | adaptive co-management indigenous; indigenous rangers; marine debris; social networks; trans-boundary diagnostic assessment |
| Cresswell ID, Murphy H. 2016. Australia state of the environment 2016: biodiversity, independent report to the Australian Government Minister for the Environment and Energy.                                                                                                                                                           | Governance   | Governance  | no keywords listed                                                                                                          |
| Katsnelson A. 2015. News Feature: Microplastics present pollution puzzle. <i>Proceedings of the National Academy of Sciences</i> 112: 5547–5549.                                                                                                                                                                                        | Review       | Governance  | no keywords listed                                                                                                          |
| Keep Australia Beautiful. 2018. 2018-19 annual report. Western Australian Government.                                                                                                                                                                                                                                                   | Governance   | Action      | no keywords listed                                                                                                          |
| Rohmana QA, Fischer AM, Gemmill J, Gemmill J, Ambrosio LD, Jones G, He K. 2019. Perceptions and information disclosure of water quality issues in Australia.                                                                                                                                                                            | Substrate    | Water       | no keywords listed                                                                                                          |
| Slavin C, Grage A, Campbell ML. 2012. Linking social drivers of marine debris with actual marine debris on beaches. <i>Marine Pollution Bulletin</i> 64: 1580–1588.                                                                                                                                                                     | Substrate    | Beach       | litter; pollution; littering behaviour; marine debris source; fishing gear pollution; urbanisation                          |



|                                                                                                                                                                                                                                                                              |            |            |                                                                           |
|------------------------------------------------------------------------------------------------------------------------------------------------------------------------------------------------------------------------------------------------------------------------------|------------|------------|---------------------------------------------------------------------------|
| Townsend K. 2017. Human impacts on the marine environment. <i>Geodate</i> 30: 3–8.                                                                                                                                                                                           | Governance | Management | no keywords listed                                                        |
| van der Velde T, Milton DA, Lawson TJ, Wilcox C, Lansdell M, Davis G, Perkins G, Hardesty BD. 2017. Comparison of marine debris data collected by researchers and citizen scientists: Is citizen science data worth the effort? <i>Biological Conservation</i> 208: 127–138. | Governance | Knowledge  | participatory research; public engagement; students; training; volunteers |
| Wilson SP, Verlis KM. 2017. The ugly face of tourism: Marine debris pollution linked to visitation in the southern Great Barrier Reef, Australia. <i>Marine Pollution Bulletin</i> 117: 239–246.                                                                             | Substrate  | Beach      | marine debris; litter; sources; tourism; Great Barrier Reef; management   |

### **Sources Distribution and Trend**

|                                                                                                                                                                                                         |                  |           |                                                                                    |
|---------------------------------------------------------------------------------------------------------------------------------------------------------------------------------------------------------|------------------|-----------|------------------------------------------------------------------------------------|
| Bauer-Civiello A, Critchell K, Hoogenboom M, Hamann M. 2019. Input of plastic debris in an urban tropical river system. <i>Marine Pollution Bulletin</i> 144: 235–242.                                  | Substrate        | Water     | litter; river; storm drains; rainfall; run-off; pollution                          |
| Bauer-Civiello A, Loder J, Hamann M. 2018. Using citizen science data to assess the difference in marine debris loads on reefs in Queensland, Australia. <i>Marine Pollution Bulletin</i> 135: 458–465. | Substrate        | Reef      | marine debris; litter; pollution; fishing line; subtidal; coral reefs              |
| Brennan E, Wilcox C, Hardesty BD. 2018. Connecting flux, deposition and resuspension in coastal debris surveys. <i>Science of the Total Environment</i> 644: 1019–1026.                                 | Substrate        | Beach     | marine debris; marine pollution; plastic; cleanup                                  |
| Broadhurst MK, Millar RB. 2019. Effects of twine material on the marine debris and relative ghost fishing of portunid hoop (tangle) nets. <i>Aquaculture and Fisheries</i> 5: 99–104.                   | Effect           | Nets      | fishing debris; marine debris; polyamide; recreational fishing                     |
| Broom D. 2015. Peak plastic: The proliferation of plastic. <i>ReNew: Technology for a Sustainable Future</i> 133: 62–66.                                                                                | Governance       | Knowledge | no keywords listed                                                                 |
| Critchell K, Lambrechts J. 2016. Modelling accumulation of marine plastics in the coastal zone; what are the dominant physical processes? <i>Estuarine, Coastal and Shelf Science</i> 171: 111–122.     | Physical Process | Ocean     | marine debris; coastal; oceanography; wind shadow; modelling; sensitivity analysis |
| Cunningham ADJ, Wilson SP. 2003. Marine Debris on Beaches of the Greater Sydney Region. <i>Journal of Coastal Research</i> 19: 421–430.                                                                 | Substrate        | Beach     | flotsam; jetsam; ocean; Australia; stormwater pollution                            |
| Duckett PE, Repaci V. 2015. Marine plastic pollution: Using community science to address a global problem. <i>Marine and Freshwater Research</i> 66: 665–673.                                           | Substrate        | Beach     | conservation; consumerism; education; government                                   |
| Edyvane KS, Dalgetty A, Hone PW, Higham JS, Wace NM. 2004. Long-term                                                                                                                                    | Substrate        | Beach     | marine litter; marine                                                              |

|                                                                                                                                                                                                                                                                                                                                                             |                  |        |                                                                                                                  |
|-------------------------------------------------------------------------------------------------------------------------------------------------------------------------------------------------------------------------------------------------------------------------------------------------------------------------------------------------------------|------------------|--------|------------------------------------------------------------------------------------------------------------------|
| marine litter monitoring in the remote Great Australian Bight, South Australia. <i>Marine Pollution Bulletin</i> 48: 1060–1075.                                                                                                                                                                                                                             |                  |        | monitoring; Great Australian Bight; fisheries; fishing debris; Southern Ocean                                    |
| Frost A, Cullen M. 1997. Marine debris on northern New South Wales beaches (Australia): Sources and the role of beach usage. <i>Marine Pollution Bulletin</i> 34: 348–352.                                                                                                                                                                                  | Substrate        | Beach  | no keywords listed                                                                                               |
| Hajbane S, Pattiaratchi CB. 2017. Plastic Pollution Patterns in Offshore, Nearshore and Estuarine Waters: A Case Study from Perth, Western Australia. <i>Frontiers in Marine Science</i> 4: 63.                                                                                                                                                             | Substrate        | Water  | plastic pollution; spatiotemporal variability; coastal oceanography; Western Australia; mitigation; fishing line |
| Hardesty BD, Lawson TJ, van der Velde T, Lansdell M, Wilcox C. 2017a. Estimating quantities and sources of marine debris at a continental scale. <i>Frontiers in Ecology and the Environment</i> 15: 18–25.                                                                                                                                                 | Substrate        | Ocean  | no keywords listed                                                                                               |
| Hardesty D, Reisser J, Sharples R, Wilcox C. 2011. Understanding the types, sources, and at-sea distribution of marine debris in Australian waters. In: Carswell, B., K. McElwee, and S. Morison (eds.). 2011. <i>Technical Proceedings of the Fifth International Marine Debris Conference</i> . March 20–25, 2011. NOAA Technical Memorandum NOS-OR&R-38. | Physical Process | Ocean  | no keywords listed                                                                                               |
| Hastings K, Smith W, Taylor H, Mouritz R. 2014. 2014 West Australian Beach Clean-Up Report. Tangaroa Blue Foundation.                                                                                                                                                                                                                                       | Governance       | Action | no keywords listed                                                                                               |
| Hastings K, Smith W, Taylor H, Mouritz R. 2017. 2017 West Australian Beach Clean - up Report Card. Tangaroa Blue Foundation.                                                                                                                                                                                                                                | Governance       | Action | no keywords listed                                                                                               |
| Hastings K, Smith W, Taylor H. 2016. West Australian Beach Clean-up Report 2016. Tangaroa Blue Foundation.                                                                                                                                                                                                                                                  | Governance       | Action | no keywords listed                                                                                               |
| Haynes D. 1997. Marine debris on continental islands and sand cays in the Far Northern Section of the Great Barrier Reef Marine Park, Australia. <i>Marine Pollution Bulletin</i> 34: 276–279.                                                                                                                                                              | Substrate        | Beach  | no keywords listed                                                                                               |
| Jensen LH, Motti CA, Garm AL, Tonin H, Kroon FJ. 2019. Sources, distribution and fate of microfibres on the Great Barrier Reef, Australia. <i>Scientific Reports</i> 9: 1–16.                                                                                                                                                                               | Biota            | Fish   | no keywords listed                                                                                               |
| Johnston G. 2016. Clean4Shore Program 2016 Report Hawkesbury River, Brisbane Waters, Tuggerah Lakes. Tangaroa Blue Foundation.                                                                                                                                                                                                                              | Governance       | Action | no keywords listed                                                                                               |

|                                                                                                                                                                                                                                                                                                |                  |               |                                                                                                       |
|------------------------------------------------------------------------------------------------------------------------------------------------------------------------------------------------------------------------------------------------------------------------------------------------|------------------|---------------|-------------------------------------------------------------------------------------------------------|
| Johnston G. 2017. Clean4Shore Program Report 2017 Hawkesbury River and Brisbane Waters. Tangaroa Blue Foundation.                                                                                                                                                                              | Governance       | Action        | no keywords listed                                                                                    |
| Johnston G. 2018. Clean4Shore Program Report 2018 Hawkesbury River and Brisbane Waters. Tangaroa Blue Foundation.                                                                                                                                                                              | Governance       | Action        | no keywords listed                                                                                    |
| Klekociuk A, Wienecke B. 2017. Australia state of the environment 2016: Antarctic environment, independent report to the Australian Government Minister for the Environment and Energy, Australian Government Department of the Environment and Energy, Canberra, doi:10.4226/94/58b65b2b307c0 | Review           | Antarctica    | no keywords listed                                                                                    |
| Kowalczyk N, Blake N, Charko F, Quek Y. 2017. Microplastics in the Maribyrnong and Yarra Rivers, Melbourne, Australia.                                                                                                                                                                         | Substrate        | Water         | no keywords listed                                                                                    |
| Kroon F, Motti C, Talbot S, Sobral P, Puotinen M. 2018. A workflow for improving estimates of Microplastic contamination in marine waters: A case study from North-Western Australia. Environmental Pollution 238: 26–38.                                                                      | Technique        | Contaminants  | tows; anthropogenic; microparticles; ftir; spectroscopy                                               |
| Ling SD, Sinclair M, Levi CJ, Reeves SE, Edgar GJ. 2017. Ubiquity of Microplastics in coastal seafloor sediments. Marine Pollution Bulletin 121: 104–110.                                                                                                                                      | Substrate        | Sediment      | marine plastic; pollution; heavy metals; sewage; estuary; reef                                        |
| Maher M, Hastings K, Smith W, Taylor H. 2019. 2018 WA Marine Debris Project Report Card. Tangaroa Blue Foundation.                                                                                                                                                                             | Governance       | Action        | no keywords listed                                                                                    |
| Mallinson L, Taylor H, Shea OO. 2013. Mallinson L, Taylor H, Shea OO. 2013. A review of plastic resin pellet distribution throughout Australia and mitigation methods for reducing spill-over into the marine environment. Tangaroa Blue Foundation.                                           | Review           | Plastic       | no keywords listed                                                                                    |
| Nott J, Hubbert G. 2005. Comparisons between topographically surveyed debris lines and modelled inundation levels from severe tropical cyclones Vance and Chris, and their geomorphic impact on the sand coast. Australian Meteorological Magazine 54: 187–196.                                | Substrate        | Beach         | no keywords listed                                                                                    |
| Official Committee Hansard SENATE. 2016. Toxic tide: the threat of marine plastic pollution in Australia. Senate Printing Unit, Parliament House.                                                                                                                                              | Review           | Ocean         | no keywords listed                                                                                    |
| Pearce A, Jackson G, Cresswell GR. 2019. Marine debris pathways across the southern Indian Ocean. Deep-Sea Research Part II: Topical Studies in Oceanography 166: 34-42.                                                                                                                       | Physical Process | Ocean         | Indian Ocean Subtropical Gyre; South Equatorial Current; South Indian Ocean Current; current drifters |
| Reisser J, Shaw J, Hallegraeff G, Proietti M, Barnes DKA, Thums M, Wilcox C,                                                                                                                                                                                                                   | Biota            | Microorganism | no keywords listed                                                                                    |

|                                                                                                                                                                                                                     |                  |          |                                                                               |
|---------------------------------------------------------------------------------------------------------------------------------------------------------------------------------------------------------------------|------------------|----------|-------------------------------------------------------------------------------|
| Hardesty BD, Pattiaratchi C. 2014. Millimeter-sized marine plastics: A new pelagic habitat for microorganisms and invertebrates. PLoS ONE 9: e100289.                                                               |                  |          |                                                                               |
| Reisser J, Shaw J, Wilcox C, Hardesty BD, Proietti M, Thums M, Pattiaratchi C. 2013. Marine plastic pollution in waters around Australia: Characteristics, concentrations, and pathways. PLoS ONE 8: e80466.        | Physical Process | Ocean    | no keywords listed                                                            |
| Rudduck OA, Lavers JL, Fischer AM, Stuckenbrock S, Sharp PB, Banati RB. 2017. Inter-annual variation in the density of anthropogenic debris in the Tasman Sea. Marine Pollution Bulletin 124: 51–55.                | Substrate        | Water    | Australia; marine debris; plastic pollution; Tasman sea                       |
| Schuyler Q, Smith W, Taylor H. 2016. Cape York Clean-up Report 2015-2016 Tangaroa Blue Foundation.                                                                                                                  | Governance       | Action   | no keywords listed                                                            |
| Slavin CM. 2011. Types and Sources of Marine Debris in Northern Tasmania. Honours Thesis. CQ University.                                                                                                            | Substrate        | Beach    | no keywords listed                                                            |
| Slip DJ, Burton HR. 1991. Accumulation of Fishing Debris, Plastic Litter, and Other Artefacts, on Heard and Macquarie Islands in the Southern Ocean. Environmental Conservation 18: 249–254.                        | Substrate        | Beach    | no keywords listed                                                            |
| Smith SDA, Banister K, Fraser N, Edgar RJ. 2018. Tracing the source of marine debris on the beaches of northern New South Wales, Australia: The Bottles on Beaches program. Marine Pollution Bulletin 126: 304–307. | Substrate        | Beach    | citizen science; plastics; MARPOL; remote beaches                             |
| Smith SDA, Edgar RJ. 2014. Documenting the density of subtidal marine debris across multiple marine and coastal habitats. PLoS ONE 9:.                                                                              | Substrate        | Coast    | no keywords listed                                                            |
| Smith SDA, Gillies CL, Shortland-Jones H. 2014. Patterns of marine debris distribution on the beaches of Rottnest Island, Western Australia. Marine Pollution Bulletin 88: 188–193.                                 | Substrate        | Beach    | citizen science; fishing; in situ deposition; management; plastic; volunteers |
| Smith SDA, Markic A. 2013. Estimates of marine debris accumulation on beaches are strongly affected by the temporal scale of sampling. PLoS ONE 8: 8–13.                                                            | Technique        | Sampling | no keywords listed                                                            |
| Smith SDA. 2010. A review of marine debris in the Northern Rivers region of New South Wales. Report to the Northern Rivers Catchment Management Authority 25.                                                       | Review           | Beach    | no keywords listed                                                            |
| Smith W, Hastings K, Taylor H, Mouritz R, Ashton K. 2015a. West Australian Beach Clean-up Report 2015. Tangaroa Blue Foundation.                                                                                    | Governance       | Action   | no keywords listed                                                            |
| Smith W, Lambeth L. 2012. Darwin Harbour Clean-Up An assessment of the data focussing on the container deposit scheme and plastic shopping bag                                                                      | Governance       | Action   | no keywords listed                                                            |

|                                                                                                                                                                                                           |                  |        |                                                                                  |
|-----------------------------------------------------------------------------------------------------------------------------------------------------------------------------------------------------------|------------------|--------|----------------------------------------------------------------------------------|
| ban September 2012. Tangaroa Blue Foundation.                                                                                                                                                             |                  |        |                                                                                  |
| Smith W, Taylor H, Ashton K, Shea OO, Mouritz R. 2013. 2013 West Australian Beach Clean-up Report. Tangaroa Blue Foundation.                                                                              | Governance       | Action | no keywords listed                                                               |
| Smith W, Taylor H, Johnston G. 2015. Clean4Shore Program 2015 Report. Tangaroa Blue Foundation.                                                                                                           | Governance       | Action | no keywords listed                                                               |
| Smith W, Taylor H, O'Shea OR. 2012. 2012 West Australian Beach Cleanup Report. Tangaroa Blue Foundation.                                                                                                  | Governance       | Action | no keywords listed                                                               |
| Smith W, Taylor H. 2009. 2009 South West Marine Debris Project (South West Australia) Technical Report. Tangaroa Blue Foundation.                                                                         | Governance       | Action | no keywords listed                                                               |
| Smith W, Taylor H. 2010. 2010 South West Marine Debris Project (South West Australia) Technical Report. Tangaroa Blue Foundation.                                                                         | Governance       | Action | no keywords listed                                                               |
| Smith W, Taylor H. 2011. 2011 West Australian Marine Debris Project Technical Report. Tangaroa Blue Foundation.                                                                                           | Governance       | Action | no keywords listed                                                               |
| Smith W. 2008. Fremantle Port and the Swan River as Sources of Plastic Resin Pellets. Tangaroa Blue Foundation.                                                                                           | Governance       | Action | no keywords listed                                                               |
| Smith W. 2010. Plastic Resin Pellets on the Western South Coast of West Australia. Tangaroa Blue Foundation.                                                                                              | Governance       | Action | no keywords listed                                                               |
| Taffs KH, Cullen MC. 2005. The distribution and abundance of Beach debris on isolated beaches of northern New South Wales, Australia. Australasian Journal of Environmental Management 12: 244–250.       | Substrate        | Beach  | no keywords listed                                                               |
| Taylor H, Smith W. 2009. 2009 Far North Queensland Marine Debris Project Report. Tangaroa Blue Foundation.                                                                                                | Governance       | Action | no keywords listed                                                               |
| Taylor H, Smith W. 2010. 2010 - 11 Victorian Surf Coast Marine Debris Project Report. Tangaroa Blue Foundation.                                                                                           | Governance       | Action | no keywords listed                                                               |
| van der Mheen M, Pattiaratchi C, van Sebille E. 2019. Role of Indian Ocean Dynamics on Accumulation of Buoyant Debris. Journal of Geophysical Research: Oceans 124: 2571–2590.                            | Physical Process | Ocean  | no keywords listed                                                               |
| Whiting SD. 1998. Types and Sources of Marine Debris in Fog Bay, Northern Australia. Marine Pollution Bulletin 36: 904–910.                                                                               | Substrate        | Beach  | debris; marine; Australia; source; litter; rubbish; pollution                    |
| Wilcox C, Hardesty BD, Sharples R, Griffin DA, Lawson TJ, Gunn R. 2013. Ghostnet impacts on globally threatened turtles, a spatial risk analysis for northern Australia. Conservation Letters 6: 247–254. | Biota            | Turtle | biodiversity impact; ghostnet; marine debris; net swept area; threatened species |

|                                                                                                                                                                                                                                              |           |          |                                                                                  |
|----------------------------------------------------------------------------------------------------------------------------------------------------------------------------------------------------------------------------------------------|-----------|----------|----------------------------------------------------------------------------------|
| Wilcox C, Hardesty BD. 2016. Biodegradable nets are not a panacea, but can contribute to addressing the ghost fishing problem. <i>Animal Conservation</i> 19: 322–323.                                                                       | Effect    | Nets     | no keywords listed                                                               |
| Wilcox C, Heathcote G, Goldberg J, Gunn R, Peel D, Hardesty BD. 2015. Understanding the sources and effects of abandoned, lost, and discarded fishing gear on marine turtles in northern Australia. <i>Conservation Biology</i> 29: 198–206. | Biota     | Turtle   | bycatch; cryptic mortality; derelict nets; gill net; illegal fishing; IUU; trawl |
| Willis KA, BD Hardesty, Kriwoken L, Wilcox C. 2017a. Differentiating littering, urban runoff and marine transport as sources of marine debris in coastal and estuarine environments. <i>Scientific Reports</i> 7: 1–9.                       | Substrate | Coast    | no keywords listed                                                               |
| Willis KA, Eriksen R, Wilcox C, Hardesty BD. 2017b. Microplastic distribution at different sediment depths in an urban estuary. <i>Frontiers in Marine Science</i> 4: 1–8.                                                                   | Substrate | Sediment | core samples; estuary; microplastics; plastic fibers; sediment                   |
| Kroon FJ, Motti CE, Jensen LH, Berry KLE. 2018. Classification of marine microdebris: A review and case study on fish from the Great Barrier Reef, Australia. <i>Scientific Reports</i> 8: 1–15                                              | Biota     | Fish     | no keywords listed                                                               |

## United Kingdom

---

### Culture Sustainability Future

|                                                                                                                                                                                                                              |            |            |                                                            |
|------------------------------------------------------------------------------------------------------------------------------------------------------------------------------------------------------------------------------|------------|------------|------------------------------------------------------------|
| Cole HA. 1979. Marine Pollution - Facts and Fiction, the Situation in Britain. <i>Ocean Management</i> 5: 263–278.                                                                                                           | Review     | Governance | no keywords listed                                         |
| Hastings E, Potts T. 2013. Marine litter: Progress in developing an integrated policy approach in Scotland. <i>Marine Policy</i> 42: 49–55.                                                                                  | Governance | Governance | marine litter; marine policy; policy integration; Scotland |
| Van Sebille E, Gilbert A, Spathi C. 2016. The ocean plastic pollution challenge: towards solutions in the UK.                                                                                                                | Governance | Governance | no keywords listed                                         |
| Wentworth J, Stafford C. 2016. Marine Microplastic Pollution. <i>POSTnote</i> 528: 1–5.                                                                                                                                      | Governance | Governance | no keywords listed                                         |
| A preliminary assessment of the economic, environmental and societal impacts of a potential ban on plastic straws, plastic stem cotton buds and plastic drinks stirrers. Department for Environment, Food and Rural Affairs. | Governance | Governance | no keywords listed                                         |
| Al-Salem, S.M.; Lettieri, P.; Baeyens, J. Recycling and recovery routes of plastic                                                                                                                                           | Governance | Governance | no keywords listed                                         |

|                                                                                                                                                                                                                                       |            |            |                    |
|---------------------------------------------------------------------------------------------------------------------------------------------------------------------------------------------------------------------------------------|------------|------------|--------------------|
| solid waste (PSW): a review. <i>Waste Management</i> . 2019, 29, 2625-2643.                                                                                                                                                           |            |            |                    |
| Hahladakis, J.N.; Purnell, P.; Iacovidou, E.; Velis, C.A.; Atseyinku, M. Post-consumer plastic packaging waste in England: assessing the yield of multiple collection-recycling schemes. <i>Waste Management</i> . 2018, 75, 149-159. | Governance | Governance | no keywords listed |
| Our waste, our resources: a strategy for England. 2018. HM Government.                                                                                                                                                                | Governance | Governance | no keywords listed |
| Singer, J. Does the UK government's target to recycle 25% of household waste by the year 2000 represent an economic approach to recycling? A case study of plastic. <i>Resources, Conservation and Recycling</i> . 1995, 14, 133-155. | Governance | Governance | no keywords listed |
| Smith, D.N.; Harrison, L.M.; Simons, A.J. A survey of schemes in the United Kingdom collecting plastic bottles for recycling. 1999, 25, 17-34.                                                                                        | Governance | Governance | no keywords listed |
| Wong, C. A study of plastic recycling supply chain. Publisher: The Chartered Institute of Logistics and Transport UK. 2010.                                                                                                           | Governance | Governance | no keywords listed |

### **Environmental Interaction Impact**

|                                                                                                                                                                                                        |              |           |                                                                                                  |
|--------------------------------------------------------------------------------------------------------------------------------------------------------------------------------------------------------|--------------|-----------|--------------------------------------------------------------------------------------------------|
| Acampora H, Berrow S, Newton S, O'Connor I. 2017. Presence of plastic litter in pellets from Great Cormorant ( <i>Phalacrocorax carbo</i> ) in Ireland. <i>Marine Pollution Bulletin</i> 117: 512–514. | Biota        | Bird      | marine litter; plastics; seabirds; Phalacrocoracidae; pellets                                    |
| Acampora H, Lyashevskaya O, Van Franeker JA, O'Connor I. 2016. The use of beached bird surveys for marine plastic litter monitoring in Ireland. <i>Marine Environmental Research</i> 120: 122–129.     | Biota        | Bird spp. | ingestion; plastic litter; fulmar; multispecies; beached bird survey                             |
| Allen R, Jarvis D, Sayer S, Mills C. 2012. Entanglement of grey seals <i>Halichoerus grypus</i> at a haul out site in Cornwall, UK. <i>Marine Pollution Bulletin</i> 64: 2815–2819.                    | Biota        | Seal      | Grey Seal; net; entanglement; debris                                                             |
| Ashton K, Holmes L, Turner A. 2010. Association of metals with plastic production pellets in the marine environment. <i>Marine Pollution Bulletin</i> 60: 2050–2055.                                   | Contaminants | Chemicals | plastic production pellets; metals; adsorption; precipitation                                    |
| Bakir A, Rowland SJ, Thompson RC. 2012. Competitive sorption of persistent organic pollutants onto Microplastics in the marine environment. <i>Marine Pollution Bulletin</i> 64: 2782–2789.            | Contaminants | Chemicals | competition; mixtures; pops; plastic microparticles; sorption                                    |
| Bakir A, Rowland SJ, Thompson RC. 2014. Enhanced desorption of persistent organic pollutants from Microplastics under simulated physiological conditions. <i>Environmental Pollution</i> 185: 16–23.   | Contaminants | Chemicals | marine strategy framework directive; microplastic; hydrophobic organic compounds; desorption gut |

|                                                                                                                                                                                                                                                                                   |              |             |                                                                                                                                                        |
|-----------------------------------------------------------------------------------------------------------------------------------------------------------------------------------------------------------------------------------------------------------------------------------|--------------|-------------|--------------------------------------------------------------------------------------------------------------------------------------------------------|
| Bakir A, Rowland SJ, Thompson RC. 2014. Transport of persistent organic pollutants by Microplastics in estuarine conditions. <i>Estuarine, Coastal and Shelf Science</i> 140: 14–21.                                                                                              | Contaminants | Chemicals   | surfactant<br>brackish waters; hydrophobic organic compounds; marine strategy framework directive; plastic particles; sorption plankton; microplastic; |
| Botterell ZLR, Beaumont N, Dorrington T, Steinke M, Thompson RC, Lindeque PK. 2019. Bioavailability and effects of Microplastics on marine zooplankton: A review. <i>Environmental Pollution</i> 245: 98–110.                                                                     | Biota        | Review      | selectivity; marine litter; plastic pollution                                                                                                          |
| Browne MA, Dissanayake A, Galloway TS, Lowe DM, Thompson RC. 2008. Ingested microscopic plastic translocates to the circulatory system of the mussel, <i>Mytilus edulis</i> (L.). <i>Environmental Science and Technology</i> 42: 5026–5031.                                      | Biota        | Bivalve     | polystyrene (ps) microspheres                                                                                                                          |
| Catarino AI, Macchia V, Sanderson WG, Thompson RC, Henry TB. 2018. Low levels of Microplastics (MP) in wild mussels indicate that MP ingestion by humans is minimal compared to exposure via household fibres fallout during a meal. <i>Environmental Pollution</i> 237: 675–684. | Biota        | Bivalve     | microplastics; mussels; fibres; field assessment; airborne household dust                                                                              |
| Catarino AI, Thompson R, Sanderson W, Henry TB. 2017. Development and optimization of a standard method for extraction of Microplastics in mussels by enzyme digestion of soft tissues. <i>Environmental Toxicology and Chemistry</i> 36: 947–951.                                | Biota        | Bivalve     | emerging pollutants; environmental toxicology; enzymatic digestion; Fourier Transform Infrared (ft-ir); microplastics; mussels;                        |
| Clark JR, Cole M, Lindeque PK, Fileman E, Blackford J, Lewis C, Lenton TM, Galloway TS. 2016. Marine Microplastic debris: a targeted plan for understanding and quantifying interactions with marine life. <i>Frontiers in Ecology and the Environment</i> 14: 317–324.           | Biota        | Review      | no keywords listed                                                                                                                                     |
| Cole M, Galloway TS. 2015. Ingestion of Nanoplastics and Microplastics by Pacific Oyster Larvae. <i>Environmental Science &amp; Technology</i> 49: 14625–14632.                                                                                                                   | Biota        | Bivalve     | polyethylene beads                                                                                                                                     |
| Cole M, Lindeque P, Fileman E, Halsband C, Galloway TS. 2015. The Impact of Polystyrene Microplastics on Feeding, Function and Fecundity in the Marine Copepod <i>Calanus helgolandicus</i> . <i>Environmental Science &amp; Technology</i> 49: 1130–1137.                        | Biota        | Zooplankton | polystyrene (ps) beads                                                                                                                                 |
| Cole M, Lindeque P, Fileman E, Halsband C, Goodhead R, Moger J, Galloway TS.                                                                                                                                                                                                      | Biota        | Zooplankton | commercial polystyrene (ps)                                                                                                                            |



|                                                                                                                                                                                                                                                                                                   |           |               |                                                                                        |
|---------------------------------------------------------------------------------------------------------------------------------------------------------------------------------------------------------------------------------------------------------------------------------------------------|-----------|---------------|----------------------------------------------------------------------------------------|
| 2013. Microplastic ingestion by zooplankton. Environmental Science and Technology 47: 6646–6655.                                                                                                                                                                                                  |           |               | spheres                                                                                |
| Cole M, Lindeque P, Halsband C, Galloway TS. 2011. Microplastics as contaminants in the marine environment: A review. Marine Pollution Bulletin 62: 2588–2597.                                                                                                                                    | Biota     | Review        | microplastics; marine litter; plastic debris; priority pollutant                       |
| Cole M, Lindeque PK, Fileman E, Clark J, Lewis C, Halsband C, Galloway TS. 2016. Microplastics Alter the Properties and Sinking Rates of Zooplankton Faecal Pellets. Environmental Science and Technology 50: 3239–3246.                                                                          | Biota     | Zooplankton   | polystyrene (ps)                                                                       |
| Cole M. 2016. A novel method for preparing Microplastic fibers. Scientific Reports 6: 1–7.                                                                                                                                                                                                        | Technique | Sampling      | no keywords listed                                                                     |
| Coppock RL, Galloway TS, Cole M, Fileman ES, Queirós AM, Lindeque PK. 2019. Microplastics alter feeding selectivity and faecal density in the copepod, <i>Calanus helgolandicus</i> . Science of the Total Environment 687: 780–789.                                                              | Biota     | Copepod       | biological carbon pump; faecal pellet; marine pollution; plastic; sinking; zooplankton |
| Courtene-Jones W, Quinn B, Ewins C, Gary SF, Narayanaswamy BE. 2019. Consistent Microplastic ingestion by deep-sea invertebrates over the last four decades (1976–2015), a study from the North East Atlantic. Environmental Pollution 244: 503–512.                                              | Biota     | Invertebrates | microplastic; time series; deep sea; marine litter; long-term study                    |
| Courtene-Jones W, Quinn B, Murphy F, Gary SF, Narayanaswamy BE. 2017. Optimisation of enzymatic digestion and validation of specimen preservation methods for the analysis of ingested Microplastics. Analytical Methods 9: 1437–1445.                                                            | Biota     | Bivalve       | no keywords listed                                                                     |
| Cunningham EM, Sigwart JD. 2019. Environmentally accurate Microplastic levels and their absence from exposure studies. Integrative and Comparative Biology 59: 1485–1496.                                                                                                                         | Review    | Biota         | no keywords listed                                                                     |
| Devriese LI, van der Meulen MD, Maes T, Bekaert K, Paul-Pont I, Frère L, Robbens J, Vethaak AD. 2015. Microplastic contamination in brown shrimp ( <i>Crangon crangon</i> , Linnaeus 1758) from coastal waters of the Southern North Sea and Channel area. Marine Pollution Bulletin 98: 179–187. | Biota     | Decapod       | microplastics; synthetic fibers; <i>Crangon crangon</i> ; seafood; contamination       |
| Furness RW. 1985. Plastic particle pollution: Accumulation by procellariiform seabirds at Scottish Colonies. Marine Pollution Bulletin 16: 103–106.                                                                                                                                               | Biota     | Bird          | plastic pollution; arctic; human impact; Northern Fulmar; climate change               |
| Galloway TS, Cole M, Lewis C. 2017. Interactions of Microplastic debris throughout the marine ecosystem. Nature Ecology and Evolution 1: 1–8.                                                                                                                                                     | Biota     | Review        | no keywords listed                                                                     |

|                                                                                                                                                                                                                                                                  |              |             |                                                                                                                                                                                                                   |
|------------------------------------------------------------------------------------------------------------------------------------------------------------------------------------------------------------------------------------------------------------------|--------------|-------------|-------------------------------------------------------------------------------------------------------------------------------------------------------------------------------------------------------------------|
| Gouin T, Roche N, Lohmann R, Hodges G. 2011. A thermodynamic approach for assessing the environmental exposure of chemicals absorbed to Microplastic. <i>Environmental Science and Technology</i> 45: 1466–1472.                                                 | Contaminants | Chemicals   | no keywords listed                                                                                                                                                                                                |
| Green DS, Boots B, O'Connor NE, Thompson R. 2017. Microplastics Affect the Ecological Functioning of an Important Biogenic Habitat. <i>Environmental Science and Technology</i> 51: 68–77.                                                                       | Biota        | Bivalve     | Polylactic acid (PLA) and high density polyethylene (HDPE)                                                                                                                                                        |
| Green DS, Colgan TJ, Thompson RC, Carolan JC. 2019. Exposure to Microplastics reduces attachment strength and alters the haemolymph proteome of blue mussels ( <i>Mytilus edulis</i> ). <i>Environmental Pollution</i> 246: 423–434.                             | Biota        | Bivalve     | polylactic acid (pla) and high density polyethylene (hdpe); biodegradable; microplastics; tenacity; proteins; polylactic acid; polyethylene; immunity polylactic acid (PLA) and high density polyethylene (HDPE); |
| Green DS. 2016. Effects of Microplastics on European flat oysters, <i>Ostrea edulis</i> and their associated benthic communities. <i>Environmental Pollution</i> 216: 95–103.                                                                                    | Biota        | Bivalve     | plastic debris; marine litter; polylactic acid; polyethylene; <i>Ostrea edulis</i> ; mesocosms; assemblages                                                                                                       |
| Harris MP, Wanless S. 1994. Ingested elastic and other artifacts found in puffins in Britain over a 24-year period. <i>Marine Pollution Bulletin</i> 28: 54–55.                                                                                                  | Biota        | Bird        | no keywords listed                                                                                                                                                                                                |
| Hermesen E, Pompe R, Besseling E, Koelmans AA. 2017. Detection of low numbers of Microplastics in North Sea fish using strict quality assurance criteria. <i>Marine Pollution Bulletin</i> 122: 253–258.                                                         | Biota        | Fish        | analytical method; fish; ingestion; microplastics; quality assurance                                                                                                                                              |
| Hodgson DJ, Bréchon AL, Thompson RC. 2018. Ingestion and fragmentation of plastic carrier bags by the amphipod <i>Orchestia gammarellus</i> : Effects of plastic type and fouling load. <i>Marine Pollution Bulletin</i> 127: 154–159.                           | Biota        | Zooplankton | High density polyethylene (HDPE), degradable and biodegradable plastics; microplastic; biofouling; single-use carrier bags; polyethylene; litter; polymers                                                        |
| Horton AA, Jürgens MD, Lahive E, van Bodegom PM, Vijver MG. 2018. The influence of exposure and physiology on Microplastic ingestion by the freshwater fish <i>Rutilus rutilus</i> (roach) in the River Thames, UK. <i>Environmental Pollution</i> 236: 188–194. | Effect       | Toxicology  | plastic pollution; fibres; uptake; exposure; RAMAN                                                                                                                                                                |
| Hurley RR, Woodward JC, Rothwell JJ. 2017. Ingestion of Microplastics by                                                                                                                                                                                         | Substrate    | Sediment    | no keywords listed                                                                                                                                                                                                |

|                                                                                                                                                                                                                                                       |              |                |                                                                                                            |
|-------------------------------------------------------------------------------------------------------------------------------------------------------------------------------------------------------------------------------------------------------|--------------|----------------|------------------------------------------------------------------------------------------------------------|
| Freshwater Tubifex Worms. Environmental Science & Technology 51: 12844–12851.                                                                                                                                                                         |              |                |                                                                                                            |
| Koelmans AA, Bakir A, Burton GA, Janssen CR. 2016. Microplastic as a Vector for Chemicals in the Aquatic Environment: Critical Review and Model-Supported Reinterpretation of Empirical Studies. Environmental Science & Technology 50: 3315–3326.    | Contaminants | Review         | no keywords listed                                                                                         |
| Li J, Green C, Reynolds A, Shi H, Rotchell JM. 2018. Microplastics in mussels sampled from coastal waters and supermarkets in the United Kingdom. Environmental Pollution 241: 35–44.                                                                 | Biota        | Bivalve        | <i>Mytilus</i> ; microplastics; shellfish; human consumption                                               |
| Lobelle D, Cunliffe M. 2011. Early microbial biofilm formation on marine plastic debris. Marine Pollution Bulletin 62: 197–200.                                                                                                                       | Biota        | Microorganism  | biofilm; plastic debris; polyethylene; pollution; bacteria                                                 |
| Lusher AL, Hernandez-Milian G, O'Brien J, Berrow S, O'Connor I, Officer R. 2015. Microplastic and macroplastic ingestion by a deep diving, oceanic cetacean: The True's beaked whale <i>Mesoplodon mirus</i> . Environmental Pollution 199: 185–191.  | Biota        | Marine Mammals | Atlantic ocean; marine pollution; plastic debris; True's Beaked Whale; microplastics                       |
| Lusher AL, McHugh M, Thompson RC. 2013. Occurrence of Microplastics in the gastrointestinal tract of pelagic and demersal fish from the English Channel. Marine Pollution Bulletin 67: 94–99.                                                         | Biota        | Fish           | marine debris; plastic; feeding; ft-ir; polymer                                                            |
| McGoran AR, Clark PF, Morrith D. 2017. Presence of Microplastic in the digestive tracts of European flounder, <i>Platichthys flesus</i> , and European smelt, <i>Osmerus eperlanus</i> , from the River Thames. Environmental Pollution 220: 744–751. | Biota        | Fish           | fibres; microplastics; <i>Osmerus eperlanus</i> ; <i>Platichthys flesus</i> ; River Thames; United Kingdom |
| McGoran AR, Clark PF, Morrith D. 2017. Presence of Microplastic in the digestive tracts of European flounder, <i>Platichthys flesus</i> , and European smelt, <i>Osmerus eperlanus</i> , from the River Thames. Environmental Pollution 220: 744–751. | Biota        | Fish           | <i>Platichthys flesus</i> ; <i>Osmerus eperlanus</i> ; River Thames; microplastics; fibres; United Kingdom |
| McGoran AR, Cowie PR, Clark PF, McEvoy JP, Morrith D. 2018. Ingestion of plastic by fish: A comparison of Thames Estuary and Firth of Clyde populations. Marine Pollution Bulletin 137: 12–23.                                                        | Biota        | Fish           | microplastics; microfibrres; Thames Estuary; Firth of Clyde fish populations; FTIR spectroscopy            |
| Muller-Karanassos C, Turner A, Arundel W, Vance T, Lindeque PK, Cole M. 2019. Antifouling paint particles in intertidal estuarine sediments from                                                                                                      | Biota        | Invertebrates  | antifouling paint particles; microplastic; estuarine                                                       |

|                                                                                                                                                                                                                                          |              |                |                                                                                   |
|------------------------------------------------------------------------------------------------------------------------------------------------------------------------------------------------------------------------------------------|--------------|----------------|-----------------------------------------------------------------------------------|
| southwest England and their ingestion by the harbour ragworm, <i>Hediste diversicolor</i> . Environmental Pollution 249: 163–170.                                                                                                        |              |                | sediment; copper; zinc; benthic organisms                                         |
| Murphy F, Russell M, Ewins C, Quinn B. 2017. The uptake of macroplastic & microplastic by demersal & pelagic fish in the Northeast Atlantic around Scotland. Marine Pollution Bulletin 122: 353–359.                                     | Biota        | Fish           | macroplastic; microplastics; fish; ingestion; Northeast Atlantic                  |
| Murray F, Cowie PR. 2011. Plastic contamination in the decapod crustacean <i>Nephrops norvegicus</i> (Linnaeus, 1758). Marine Pollution Bulletin 62: 1207–1217.                                                                          | Biota        | Decapod        | <i>Nephrops</i> ; Clyde Sea; stomach contents; plastic filaments; fishing waste   |
| Nelms SE, Barnett J, Brownlow A, Davison NJ, Deaville R, Galloway TS, Lindeque PK, Santillo D, Godley BJ. 2019. Microplastics in marine mammals stranded around the British coast: ubiquitous but transitory? Scientific Reports 9: 1–8. | Biota        | Marine Mammals | no keywords listed                                                                |
| Nelms SE, Galloway TS, Godley BJ, Jarvis DS, Lindeque PK. 2018. Investigating Microplastic trophic transfer in marine top predators. Environmental Pollution 238: 999–1007.                                                              | Biota        | Seal           | marine mammal; microplastic; plastic; pollution; trophic transfer                 |
| O’Hanlon NJ, Bond AL, Lavers JL, Masden EA, James NA. 2019. Monitoring nest incorporation of anthropogenic debris by Northern Gannets across their range. Environmental Pollution 255: 113152.                                           | Biota        | Bird           | marine; nesting material; plastics; pollution; seabird; sentinel species; Sulidae |
| O’Hanlon NJ, James NA, Masden EA, Bond AL. 2017. Seabirds and marine plastic debris in the northeastern Atlantic: A synthesis and recommendations for monitoring and research. Environmental Pollution 231: 1291–1301.                   | Review       | Bird spp.      | no keywords listed                                                                |
| Smith LE. 2018. Plastic ingestion by <i>Scyliorhinus canicula</i> trawl captured in the North Sea. Marine Pollution Bulletin 130: 6–7.                                                                                                   | Biota        | Fish           | microplastic; ingestion; pollution; <i>Scyliorhinus canicula</i>                  |
| Steer M, Cole M, Thompson RC, Lindeque PK. 2017. Microplastic ingestion in fish larvae in the western English Channel. Environmental Pollution 226: 250–259.                                                                             | Biota        | Fish           | plastic debris; zooplankton; ft-ir; coastal fisheries                             |
| Thompson RC. 2017. Future of the Sea: Plastic Pollution. Foresight, Government Office for Science                                                                                                                                        | Review       | Governance     | no keywords listed                                                                |
| Turner A, Lau KS. 2016. Elemental concentrations and bioaccessibilities in beached plastic foam litter, with particular reference to lead in polyurethane. Marine Pollution Bulletin 112: 265–270.                                       | Contaminants | Chemicals      | plastics; polyurethane; foams; seabirds; lead; flame retardants                   |
| Turner A, Wallerstein C, Arnold R, Webb D. 2019. Marine pollution from                                                                                                                                                                   | Contaminants | Chemicals      | pyroplastic; plastiglomerates;                                                    |

|                                                                                                                                                                                                                                                           |              |               |                                                                                                           |
|-----------------------------------------------------------------------------------------------------------------------------------------------------------------------------------------------------------------------------------------------------------|--------------|---------------|-----------------------------------------------------------------------------------------------------------|
| pyroplastics. <i>Science of the Total Environment</i> 694: 133610.                                                                                                                                                                                        |              |               | marine litter; weathering; XRF; lead                                                                      |
| Turner A. 2016. Heavy metals, metalloids and other hazardous elements in marine plastic litter. <i>Marine Pollution Bulletin</i> journal 111: 136–142.                                                                                                    | Contaminants | Chemicals     | marine plastic; FP-XRF; ropes; foams; heavy metals; flame retardants                                      |
| Votier SC, Archibald K, Morgan G, Morgan L. 2011. The use of plastic debris as nesting material by a colonial seabird and associated entanglement mortality. <i>Marine Pollution Bulletin</i> 62: 168–172.                                                | Biota        | Bird          | entanglement; marine debris; plastic pollution; seabirds; nesting; Northern Gannet; <i>Morus bassanus</i> |
| Watts AJR, Lewis C, Goodhead RM, Beckett SJ, Moger J, Tyler CR, Galloway TS. 2014. Uptake and retention of Microplastics by the shore crab <i>Carcinus maenas</i> . <i>Environmental Science and Technology</i> 48: 8823–8830                             | Biota        | Decapod       | polystyrene (ps) microspheres                                                                             |
| Welden NA, Abylkhani B, Howarth LM. 2018. The effects of trophic transfer and environmental factors on Microplastic uptake by plaice, <i>Pleuronectes platessa</i> , and spider crab, <i>Maja squinado</i> . <i>Environmental Pollution</i> 239: 351–358. | Biota        | Fish          | fishing; pollution; plastic; particles; food web; Sand Eel                                                |
| Welden NA, Cowie PR. 2017. Degradation of common polymer ropes in a sublittoral marine environment. <i>Marine Pollution Bulletin</i> 118: 248–253.                                                                                                        | Technique    | Sampling      | microplastic; microfibre; marine pollution; biofouling; tensile strength; fragmentation                   |
| Welden NAC, Cowie PR. 2016. Environment and gut morphology influence Microplastic retention in langoustine, <i>Nephrops norvegicus</i> . <i>Environmental Pollution</i> 214: 859–865.                                                                     | Biota        | Decapod       | microplastic; pollution; monitoring; Decapoda                                                             |
| Welden NAC, Cowie PR. 2016. Long-term Microplastic retention causes reduced body condition in the langoustine, <i>Nephrops norvegicus</i> . <i>Environmental Pollution</i> 218: 895–900.                                                                  | Effect       | Biological    | microplastic; nutrition; <i>Nephrops norvegicus</i> ; feeding rate                                        |
| Windsor FM, Tilley RM, Tyler CR, Ormerod SJ. 2019b. Microplastic ingestion by riverine macroinvertebrates. <i>Science of the Total Environment</i> 646: 68–74.                                                                                            | Biota        | Invertebrates | biomonitoring; invertebrates; pollution; plastic; rivers                                                  |

---

### **Societal Impacts**

|                                                                                                                                                                                        |            |            |                                                                                 |
|----------------------------------------------------------------------------------------------------------------------------------------------------------------------------------------|------------|------------|---------------------------------------------------------------------------------|
| Lee J. 2015. Economic valuation of marine litter and Microplastic pollution in the marine environment: An initial assessment of the case of the United Kingdom. Discussion Paper 1–16. | Governance | Governance | economic valuation; marine litter; microplastics; environmental status; control |
|----------------------------------------------------------------------------------------------------------------------------------------------------------------------------------------|------------|------------|---------------------------------------------------------------------------------|

|                                                                                                                                                                                                                          |            |           |                                                                                               |
|--------------------------------------------------------------------------------------------------------------------------------------------------------------------------------------------------------------------------|------------|-----------|-----------------------------------------------------------------------------------------------|
| McNicholas G, Cotton M. 2019. Stakeholder perceptions of marine plastic waste management in the United Kingdom. <i>Ecological Economics</i> 163: 77–87.                                                                  | Governance | Knowledge | measures<br>no keywords listed                                                                |
| Wyles KJ, Pahl S, Carroll L, Thompson RC. 2019. An evaluation of the Fishing For Litter (FFL) scheme in the UK in terms of attitudes, behavior, barriers and opportunities. <i>Marine Pollution Bulletin</i> 144: 48–60. | Governance | Knowledge | passive fishing for litter; fishing industry; behavior change; spillover; motivations; debris |

### **Sources Distribution and Trend**

|                                                                                                                                                                                                                                                               |            |            |                                                                                      |
|---------------------------------------------------------------------------------------------------------------------------------------------------------------------------------------------------------------------------------------------------------------|------------|------------|--------------------------------------------------------------------------------------|
| Anderson ZT, Cundy AB, Croudace IW, Warwick PE, Celis-hernandez O, Stead JL. 2018. A rapid method for assessing the accumulation of Microplastics in the sea surface microlayer ( SML ) of estuarine systems. <i>Scientific Reports</i> 1–11                  | Substrate  | Water      | no keywords listed                                                                   |
| Balas CE, Williams AT, Simmons SL, Ergin A. 2001. A statistical riverine litter propagation model. <i>Marine Pollution Bulletin</i> 42: 1169–1176.                                                                                                            | Substrate  | Water      | litter; plastics; simulation model; stranding probability; river taff; Wales         |
| Blair RM, Waldron S, Gauchotte-Lindsay C. 2019. Average daily flow of Microplastics through a tertiary wastewater treatment plant over a ten-month period. <i>Water Research</i> 163: 114909.                                                                 | Governance | WWTP       | microplastic pollution; wwtp; sewage; effluent discharge; ftir-atr                   |
| Blair RM, Waldron S, Phoenix VR, Gauchotte-Lindsay C. 2019. Microscopy and elemental analysis characterisation of Microplastics in sediment of a freshwater urban river in Scotland, UK. <i>Environmental Science and Pollution Research</i> 26: 12491–12504. | Substrate  | Sediment   | microplastic; emerging contaminants; freshwater; electron microscopy; fibres         |
| Blumenröder J, Sechet P, Kakkonen JE, Hartl MGJ. 2017. Microplastic contamination of intertidal sediments of Scapa Flow, Orkney: A first assessment. <i>Marine Pollution Bulletin</i> 124: 112–120.                                                           | Substrate  | Beach      | microplastic; intertidal sediment                                                    |
| Browne MA, Galloway TS, Thompson RC. 2010. Spatial patterns of plastic debris along estuarine shorelines. <i>Environmental Science and Technology</i> 44: 3404–3409.                                                                                          | Substrate  | Beach      | no keywords listed                                                                   |
| Burns EE, Boxall ABA. 2018. Microplastics in the Aquatic Environment: Evidence for or Against Adverse Impacts and Major Knowledge Gaps. <i>Environmental Toxicology and Chemistry</i> 37: 2776–2796.                                                          | Review     | Governance | microplastics; persistent organic pollutants; risk; species sensitivity distribution |
| Caulton E, Mocogni M. 1987. Preliminary studies of man-made litter in the Firth of Forth, Scotland. <i>Marine Pollution Bulletin</i> 18: 446–450.                                                                                                             | Substrate  | Beach      | no keywords listed                                                                   |

|                                                                                                                                                                                                                                                                 |            |                 |                                                                                                   |
|-----------------------------------------------------------------------------------------------------------------------------------------------------------------------------------------------------------------------------------------------------------------|------------|-----------------|---------------------------------------------------------------------------------------------------|
| Courtene-Jones W, Quinn B, Gary SF, Mogg AOM, Narayanaswamy BE. 2017. Microplastic pollution identified in deep-sea water and ingested by benthic invertebrates in the Rockall Trough, North Atlantic Ocean. <i>Environmental Pollution</i> 231: 271–280.       | Substrate  | Sediment        | no keywords listed                                                                                |
| Gallagher A, Rees A, Rowe R, Stevens J, Wright P. 2016. Microplastics in the Solent estuarine complex, UK: An initial assessment. <i>Marine Pollution Bulletin</i> 102: 243–249.                                                                                | Substrate  | Water           | microplastics; plankton trawls; Fourier transform infrared spectroscopy (FTIR); estuarine complex |
| Holmes LA, Turner A, Thompson RC. 2012. Adsorption of trace metals to plastic resin pellets in the marine environment. <i>Environmental Pollution</i> 160: 42–48.                                                                                               | Substrate  | Beach           | plastic pellets; trace metals; adsorption; kinetics; seawater                                     |
| Horton AA, Svendsen C, Williams RJ, Spurgeon DJ, Lahive E. 2017. Large Microplastic particles in sediments of tributaries of the River Thames, UK – Abundance, sources and methods for effective quantification. <i>Marine Pollution Bulletin</i> 114: 218–226. | Substrate  | Sediment        | microplastics; freshwater; sediment; sources; pollution; RAMAN                                    |
| Hurley R, Woodward J, Rothwell JJ. 2018. Microplastic contamination of river beds significantly reduced by catchment-wide flooding. <i>Nature Geoscience</i> 11: 251–257.                                                                                       | Substrate  | Sediment        | no keywords listed                                                                                |
| Kartar S, Abou-Seedo F, Sainsbury M. 1976. Polystyrene spherules in the Severn Estuary - A progress report. <i>Marine Pollution Bulletin</i> 7: 52.                                                                                                             | Substrate  | Water, Sediment |                                                                                                   |
| Kay P, Hiscoe R, Moberley I, Bajic L, McKenna N. 2018. Wastewater treatment plants as a source of Microplastics in river catchments <i>Environmental Science and Pollution Research</i> 25: 20264–20267.                                                        | Governance | WWTP            | microplastics; emerging contaminants; rivers; water quality; pollution; wastewater                |
| Lusher AL, Burke A, Connor IO, Officer R. 2014. Microplastic pollution in the Northeast Atlantic Ocean: Validated and opportunistic sampling. <i>Marine Pollution Bulletin</i> 88: 325–333.                                                                     | Substrate  | Water           | plastic; fibres; sub-surface; neuston; continuous monitoring                                      |
| Marine Conservation Society. 2012. Beachwatch Big Weekend 2012.                                                                                                                                                                                                 | Governance | Action          | no keywords listed                                                                                |
| Marine Conservation Society. 2015. Great British Beach Clean 2014 report.                                                                                                                                                                                       | Governance | Action          | no keywords listed                                                                                |
| Marine Conservation Society. 2015. Great British beach clean 2015 report.                                                                                                                                                                                       | Governance | Action          | no keywords listed                                                                                |
| Marine Conservation Society. 2016. Great British beach clean 2016 report.                                                                                                                                                                                       | Governance | Action          | no keywords listed                                                                                |
| Marine Conservation Society. 2017. Great British beach clean 2017 report.                                                                                                                                                                                       | Governance | Action          | no keywords listed                                                                                |
| Marine Conservation Society. 2018. Great British beach clean 2018 report.                                                                                                                                                                                       | Governance | Action          | no keywords listed                                                                                |
| Marine Conservation Society. 2019. Great British beach clean 2019 report.                                                                                                                                                                                       | Governance | Action          | no keywords listed                                                                                |

|                                                                                                                                                                                                                                                                |            |                 |                                                                                                               |
|----------------------------------------------------------------------------------------------------------------------------------------------------------------------------------------------------------------------------------------------------------------|------------|-----------------|---------------------------------------------------------------------------------------------------------------|
| Martin J, Lusher A, Thompson RC, Morley A. 2017. The Deposition and Accumulation of Microplastics in Marine Sediments and Bottom Water from the Irish Continental Shelf. <i>Scientific Reports</i> 7: 1–9.                                                     | Substrate  | Sediment        | no keywords listed                                                                                            |
| Meng Y, Kelly FJ, Wright SL. 2020. Advances and challenges of Microplastic pollution in freshwater ecosystems: A UK perspective. <i>Environmental Pollution</i> 256: 113445.                                                                                   | Technique  | Review          | microplastics; freshwater; pollution; UK                                                                      |
| Morris AW, Hamilton EI. 1974. Polystyrene Spherules in the Bristol Channel. <i>Marine Pollution Bulletin</i> 5: 26–27.                                                                                                                                         | Substrate  | Water, Sediment |                                                                                                               |
| Morritt D, Stefanoudis P V., Pearce D, Crimmen OA, Clark PF. 2014. Plastic in the Thames: A river runs through it. <i>Marine Pollution Bulletin</i> 78: 196–200.                                                                                               | Substrate  | Water           | estuary; fyke-nets; plastics; River Thames; sanitary products; United Kingdom                                 |
| Murphy F, Ewins C, Carbonnier F, Quinn B. 2016. Wastewater Treatment Works (WWTW) as a Source of Microplastics in the Aquatic Environment. <i>Environmental Science and Technology</i> 50: 5800–5808.                                                          | Governance | WWTP            | no keywords listed                                                                                            |
| Nelms SE, Coombes C, Foster LC, Galloway TS, Godley BJ, Lindeque PK, Witt MJ. 2017. Marine anthropogenic litter on British beaches: A 10-year nationwide assessment using citizen science data. <i>Science of the Total Environment</i> 579: 1399–1409.        | Substrate  | Beach           | marine anthropogenic litter; citizen science; beach clean; plastic pollution; temporal trend; spatial pattern |
| Nizzetto L, Bussi G, Futter MN, Butterfield D, Whitehead PG. 2016. A theoretical assessment of Microplastic transport in river catchments and their retention by soils and river sediments. <i>Environmental Science: Processes and Impacts</i> 18: 1050–1059. | Substrate  | Water           | no keywords listed                                                                                            |
| Quilliam RS, Jamieson J, Oliver DM. 2014. Seaweeds and plastic debris can influence the survival of faecal indicator organisms in beach environments. <i>Marine Pollution Bulletin</i> 84: 201–207.                                                            | Substrate  | Beach           | beach grooming; FIO; revised bathing water directive (RWBP); waterborne pathogens; wrack                      |
| Rees G, Pond K. 1995. Marine Litter Monitoring Programmes-A Review of Methods with Special Reference to National Surveys. <i>Marine Pollution Bulletin</i> 30: 103–108.                                                                                        | Substrate  | Beach           | no keywords listed                                                                                            |
| Rodrigues A, Oliver DM, McCarron A, Quilliam RS. 2019. Colonisation of plastic pellets (nurdles) by <i>E. coli</i> at public bathing beaches. <i>Marine Pollution Bulletin</i> 139: 376–380.                                                                   | Substrate  | Beach           | bathing water directive; marine plastic debris; plastic pollution; plastisphere; public health                |
| Sadri SS, Thompson RC. 2014. On the quantity and composition of floating plastic debris entering and leaving the Tamar Estuary, Southwest England.                                                                                                             | Substrate  | Water           | marine debris; riverine litter; microplastic; plastic; tidal;                                                 |



|                                                                                                                                                                                                            |            |           |                                                                                                               |
|------------------------------------------------------------------------------------------------------------------------------------------------------------------------------------------------------------|------------|-----------|---------------------------------------------------------------------------------------------------------------|
| Marine Pollution Bulletin 81: 55–60.                                                                                                                                                                       |            |           | Tamar River                                                                                                   |
| Turner A, Wallerstein C, Arnold R. 2019. Identification, origin and characteristics of bio-bead Microplastics from beaches in western Europe. <i>Science of the Total Environment</i> 664: 938–947.        | Substrate  | Beach     | marine microplastics; pre-production pellets; bio-beads; water treatment; heavy metals; bromine               |
| Turner A. 2017. Trace elements in fragments of fishing net and other filamentous plastic litter from two beaches in SW England. <i>Environmental Pollution</i> 224: 722–728.                               | Substrate  | Beach     | filamentous plastic litter; fishing gear; fp-xrf; heavy metals; bromine; seabirds                             |
| Turrell WR. 2018. A simple model of wind-blown tidal strandlines: How marine litter is deposited on a mid-latitude, macro-tidal shelf sea beach. <i>Marine Pollution Bulletin</i> 137: 315–330.            | Substrate  | Beach     | marine plastics; beach litter; strandlines; survey design; marine strategy framework directive; descriptor 11 |
| Turrell WR. 2019. Spatial distribution of foreshore litter on the northwest European continental shelf. <i>Marine Pollution Bulletin</i> 142: 583–594.                                                     | Substrate  | Beach     | beach litter; spatial variation; northwest European shelf; monitoring; indicators                             |
| Unger A, Harrison N. 2016. Fisheries as a source of marine debris on beaches in the United Kingdom. <i>Marine Pollution Bulletin</i> 107: 52–58.                                                           | Substrate  | Beach     | marine litter; plastic debris; beach survey; MARPOL; fishing; UK                                              |
| Vaughan R, Turner SD, Rose NL. 2017. Microplastics in the sediments of a UK urban lake. <i>Environmental Pollution</i> 229: 10–18.                                                                         | Substrate  | Sediment  | lake sediments; litter; microplastics; plastics; urban lake                                                   |
| Velander KA, Mocogni M. 1998. Maritime litter and sewage contamination at Cramond Beach Edinburgh - A comparative study. <i>Marine Pollution Bulletin</i> 36: 385–389.                                     | Governance | WWTP      | no keywords listed                                                                                            |
| Watts AJR, Porter A, Hembrow N, Sharpe J, Galloway TS, Lewis C. 2017. Through the sands of time: Beach litter trends from nine cleaned north cornish beaches. <i>Environmental Pollution</i> 228: 416–424. | Governance | Knowledge | marine litter; plastic; fishing litter; tourism; un-sourced litter                                            |
| Williams AT, Randerson P, Alharbi OA. 2014. From a millennium baseline to 2012: Beach litter changes in Wales. <i>Marine Pollution Bulletin</i> 84: 17–26.                                                 | Substrate  | Beach     | beach litter; Wales; public recreation; Markov model                                                          |
| Williams AT, Simmons SL. 1999. Sources of riverine litter: The river Taff, South Wales, UK. <i>Water, Air, and Soil Pollution</i> 112: 197–216.                                                            | Substrate  | Water     | fly tipping; riverine litter; sewage; sources                                                                 |
| Windsor FM, Durance I, Horton AA, Thompson RC, Tyler CR, Ormerod SJ. 2019. A catchment-scale perspective of plastic pollution. <i>Global Change Biology</i>                                                | Substrate  | Catchment | ecological risk; ecotoxicology; macroplastic; microplastic;                                                   |

|                                                                                                                                                                                                                                             |                  |         |                                                                |
|---------------------------------------------------------------------------------------------------------------------------------------------------------------------------------------------------------------------------------------------|------------------|---------|----------------------------------------------------------------|
| 25: 1207–1221.<br>Zalasiewicz J, Waters C, Williams M, Aldridge DC, Wilkinson IP. 2018. The stratigraphical signature of the Anthropocene in England and its wider context. <i>Proceedings of the Geologists' Association</i> 129: 482–491. | Physical Process | Geology | pollution; river basin<br>Anthropocene; stratigraphy; neobiota |
|---------------------------------------------------------------------------------------------------------------------------------------------------------------------------------------------------------------------------------------------|------------------|---------|----------------------------------------------------------------|

---

## China

---

### Culture Sustainability Future

|                                                                                                                                                                        |            |            |                            |
|------------------------------------------------------------------------------------------------------------------------------------------------------------------------|------------|------------|----------------------------|
| A preliminary study on the prevention and control of Marine Microplastics pollution 李莹莹. 海洋微塑料污染防治法律问题初探[J]. 西安电子科技大学学报(社会科学版), 2018, v.28 ; No.130(01):74-80.         | Governance | Management | no english keywords listed |
| Brief analysis of Marine treatment system for plastic and Microplastic pollution 王菊英, 林新珍. 应对塑料及微塑料污染的海洋治理体系浅析[J]. 太平洋学报, 2018, v.26(04):83-91.                        | Technique  | Management | no english keywords listed |
| Development trend and existing problems of Marine Microplastic pollution research 李道季, 朱礼鑫, 常思远, et al. 海洋微塑料污染研究发展态势及存在问题[J]. 华东师范大学学报(自然科学版), 2019, 2019(3):174-185. | Review     | Substrate  | no english keywords listed |
| Ge Z, Shi H, Mei X, Dai Z, Li D. 2016. Semi-automatic recognition of marine debris on beaches. <i>Scientific Reports</i> 6: 1–9.                                       | Technique  | LIDAR      | no keywords listed         |
| Marine Microplastic pollution and its prevention and control 麻耘豪. 海洋微塑料污染及其防治[J]. 当代化工研究, 39(03):16-17.                                                                | Governance | Management | no english keywords listed |
| Microplastic pollution in freshwater environment and watershed control strategies in China 吴辰熙, 潘响亮, 施华宏, et al. 我国淡水环境微塑料污染与流域管控策略[J]. 中国科学院院刊, 2018, 33(10):16-24.   | Governance | Management | no english keywords listed |
| Pay attention to the coastal and Marine Microplastic pollution to strengthen the prevention and control of science and technology research 章海波[1,2],                   | Technique  | Management | no english keywords listed |

|                                                                                                                                                                                                                    |            |            |                                                         |
|--------------------------------------------------------------------------------------------------------------------------------------------------------------------------------------------------------------------|------------|------------|---------------------------------------------------------|
| 周倩[1,2], 周阳[1,2], et al.<br>重视海岸及海洋微塑料污染加强防治科技监管研究工作[J].<br>中国科学院院刊, 2016(31):1189.<br>Research status and countermeasures of Marine Microplastics analysis<br>methods吴立锋. 海洋微塑料分析方法研究现状及其应对措施[J].<br>环境科学与技术(05). | Technique  | Sampling   | no english keywords listed                              |
| Study on Marine Microplastic Pollution and Marine ecological environment<br>management王亭玉. 海洋微塑料污染及海洋生态环境治理研究. 牡丹江大<br>学学报, 2018, 27(3): 37-39.                                                                    | Governance | Management | no english keywords listed                              |
| Study on Marine plastics and Microplastics management legislation张嘉戌,<br>柳青, 张承龙, et al. 海洋塑料和微塑料管理立法研究[J]. 海洋环境科学,<br>38(2).                                                                                      | Governance | Management | no english keywords listed                              |
| The pollution hazard of Microplastics in coastal zone system in China and its<br>countermeasures许旺, 梁鸿, 马嵩, et al.<br>我国海岸带系统微塑料污染危害及治理对策[J]. 环境与可持续发展,<br>2018, v.43;No.688(02):23-28.                            | Technique  | Management | no english keywords listed                              |
| The pollution of Marine Microplastics and its countermeasures李道季.<br>海洋微塑料污染状况及其应对措施建议[J]. 环境科学研究, 2019,<br>32(02):21-26.                                                                                          | Governance | Management | no english keywords listed                              |
| Truong N Van, BeiPing C. 2019. Plastic marine debris: sources, impacts and<br>management. International Journal of Environmental Studies 76: 953–973.                                                              | Governance | Governance | plastic waste; annex v MARPOL<br>73/78 marine pollution |

### **Environmental Interaction Impact**

|                                                                                                                                                                                                                                                   |        |            |                            |
|---------------------------------------------------------------------------------------------------------------------------------------------------------------------------------------------------------------------------------------------------|--------|------------|----------------------------|
| Accumulation of plastic microparticles of different sizes in the gill tissues of<br>Zebra Fish and their effects on anthracene toxicity<br>蔡亚云, 赵佳玥, 李文锋, 宋文娟, 张道勇, 潘响亮. 不同粒径塑料微颗粒在斑<br>马鱼腮组织中的积累及其对蒽毒性的影响. 应用与环境生物学报, 2017, 23<br>(6):1154-1158. | Effect | Toxicology | no english keywords listed |
|---------------------------------------------------------------------------------------------------------------------------------------------------------------------------------------------------------------------------------------------------|--------|------------|----------------------------|

|                                                                                                                                                                                                          |              |             |                            |
|----------------------------------------------------------------------------------------------------------------------------------------------------------------------------------------------------------|--------------|-------------|----------------------------|
| Adsorption behavior of antibiotics on Microplastics surface张凯娜.<br>抗生素在微塑料表面的吸附行为研究[D].                                                                                                                  | Contaminants | Antibiotics | no english keywords listed |
| Adsorption of halogenated carbazole and artificial musk by<br>Microplastics张晓军. 微塑料对卤代咔唑和人工麝香的吸附研究[D].                                                                                                   | Contaminants | Chemicals   | no english keywords listed |
| Adsorption of organic pollutants by Microplastic particles and their effects on<br>their bioavailability 张凯, 孙红文.<br>(可降解)微塑料颗粒吸附有机污染物及对其生物有效性的影响[J].<br>环境化学, 2018, v.37(03):5-12.                      | Contaminants | Chemicals   | no english keywords listed |
| Advances in Marine Microplastics pollution and biodegradation 唐黎标.<br>海洋微塑料污染及生物降解研究进展[J]. 塑料包装, 2019, 29(02):9-12.                                                                                      | Technique    | Management  | no english keywords listed |
| Advances in migration distribution, biological effects and analytical methods of<br>Microplastics in the environment 王彤, 胡献刚, 周启星.<br>环境中微塑料的迁移分布、生物效应及分析方法的研究进展[J].<br>科学通报, 2018.                      | Technique    | Chemicals   | no english keywords listed |
| Advances in research on ecotoxicological effects of Microplastics on Marine<br>organisms 薄军, 陈梦云, 方超, et al.<br>微塑料对海洋生物生态毒理学效应研究进展[J]. 应用海洋学学报, 2018,<br>37(04):151-157.                                | Effect       | Toxicology  | no english keywords listed |
| Aquatic ecotoxicity and carrier effects of Microplastic pollution. 2018. 陈启晴,<br>杨守业, Henner, et al. 微塑料污染的水生生态毒性与载体作用[J].<br>生态毒理学报, 2018.                                                              | Effect       | Toxicology  | no english keywords listed |
| Characteristics and spatial and temporal distribution of Microplastic pollutants<br>in sediments from the mouth of Poyang Lake李文华, 简敏菲, 余厚平, et al.<br>鄱阳湖“五河”入湖口沉积物中微塑料污染物的特征及其时空分布[J].<br>湖泊科学, 31(2). | Substrate    | Sediment    | no english keywords listed |

|                                                                                                                                                                                                                                                                      |                  |                 |                                                                                         |
|----------------------------------------------------------------------------------------------------------------------------------------------------------------------------------------------------------------------------------------------------------------------|------------------|-----------------|-----------------------------------------------------------------------------------------|
| Characteristics of lake Microplastics pollution and its adsorption behavior with phenanthrene and pyrene in central China王文锋.<br>华中地区湖泊微塑料污染特征及其与菲、芘的吸附行为研究[D].                                                                                                      | Contaminants     | Chemicals       | no english keywords listed                                                              |
| Cheng Z, Li H, Yu L, Yang Z, Xu X, Wang H, Wong M-H. 2018. Phthalate esters distribution in coastal mariculture of Hong Kong, China. Environmental Science and Pollution Research 25: 17321–17329.                                                                   | Contaminants     | Plastisizers    | mariculture; sediment; cultured fish; phthalate esters; risk assessment;                |
| Current situation of Marine Microplastics pollution and its ecotoxicological effects on Fish武芳竹, 曾江宁, 徐晓群, et al.<br>海洋微塑料污染现状及其对鱼类的生态毒理效应[J]. 海洋学报, 2019, 41(02):89-102.                                                                                            | Effect           | Toxicology      | no english keywords listed                                                              |
| Current status of Microplastic pollution and its impact on Marine life殷岑, 魏梦碧, 刘会会. 微塑料污染现状及对海洋生物影响的研究进展[J]. 环境监控与预警, 2018, 10(06):5-15.                                                                                                                             | Effect           | Toxicology      | no english keywords listed                                                              |
| Di M, Liu X, Wang W, Wang J. 2018. Manuscript prepared for submission to Environmental Toxicology and Pharmacology Pollution in drinking water source areas: Microplastics in the Danjiangkou Reservoir, China. Environmental Toxicology and Pharmacology 65: 82–89. | Substrate        | Water, Sediment | abundance; microplastic; pollutant; sediment; water sources                             |
| Ding J, Jiang F, Li J, Wang Z, Sun C, Wang Z, Fu L, Ding NX, He C. 2019. Microplastics in the Coral Reef Systems from Xisha Islands of South China Sea. Environmental Science & Technology 53: 8036–8046 Article.                                                    | Biota            | Coral           | no keywords listed                                                                      |
| Ding J, Li J, Sun C, He C, Jiang F, Gao F, Zheng L. 2018. Separation and Identification of Microplastics in Digestive System of Bivalves. Chinese Journal of Analytical Chemistry 46: 690–697.                                                                       | Biota            | Bivalve         | bivalves; digestive system; infrared spectroscopy; microplastic; microplastic pollution |
| Distribution characteristics of Microplastics in the ocean and their effects on living things张霁琦. 微塑料在海洋中的分布特征及对生物的影响[J]. 资源节约与环保, 2018, 205(12):142-143.                                                                                                            | Physical Process | Ocean           | no english keywords listed                                                              |
| Distribution of Microplastics in the East China Sea and Yellow Sea and their accumulation in zooplankton刘涛.                                                                                                                                                          | Biota            | Zooplankton     | no english keywords listed                                                              |

|                                                                                                                                                                                                                            |              |               |                                                                                              |
|----------------------------------------------------------------------------------------------------------------------------------------------------------------------------------------------------------------------------|--------------|---------------|----------------------------------------------------------------------------------------------|
| 微塑料在黄东海的分布及其在浮游动物体内累积的研究[D]. 2017.                                                                                                                                                                                         |              |               |                                                                                              |
| Ecological effects of Marine Microplastics as biological carriers何蕾, 黄芳娟, 殷克东. 海洋微塑料作为生物载体的生态效应[J]. 热带海洋学报, 2018, 37(4).                                                                                                   | Contaminants | Plastisizers  | no english keywords listed                                                                   |
| Effect of Microplastic particles on immune gene expression of rainbow trout曹露, 李永, 梁瑞峰, et al. 微塑料颗粒对虹鳟免疫基因表达的影响[J]. 环境科学学报, 2018, v.38(08):395-400.                                                                       | Effect       | Toxicology    | no english keywords listed                                                                   |
| Environmental Behavior and Ecological Effects of Microplastics in the Ocean李富云, 贾芳丽, 涂海峰, 孙翠竹, 李锋民. 海洋中微塑料的环境行为和生态影响. 生态毒理学报, 2017, 12(6):11-18.                                                                           | Effect       | Toxicology    | no english keywords listed                                                                   |
| Feng Z, Zhang T, Li Y, He X, Wang R, Xu J, Gao G. 2019. The accumulation of Microplastics in fish from an important fish farm and mariculture area, Haizhou Bay, China. Science of the Total Environment 696: 1–10.        | Biota        | Fish          | Haizhou Bay; marine animals; microplastics; non-digestive tissues; pollution; scaleless fish |
| Fok L, Cheng NYI, Yeung Y. 2019a. Mismanaged Plastic Waste : Far Side of the Moon. Pages 1–14 in So WWM, Chow CF, and Lee JCK, eds. Environmental Sustainability and Education for Waste Management. Springer Singapore.   | Review       | Governance    | marine debris; microplastics; waste management; education; preventive strategies             |
| Fu Z, Wang J. 2019. Current practices and future perspectives of Microplastic pollution in freshwater ecosystems in China. Science of the Total Environment 691: 697–712.                                                  | Technique    | Review        | biota; China; freshwater; microplastics; sediment                                            |
| Huang J-S, Koongolla JB, Li H-X, Lin L, Pan Y-F, Liu S, He W-H, Maharana D, Xu X-R. 2019. Microplastic accumulation in fish from Zhanjiang mangrove wetland, South China. Science of the Total Environment 134839.         | Biota        | Fish          | microplastics; ingestion; accumulation; fish; mangrove                                       |
| Jabeen K, Su L, Li J, Yang D, Tong C, Mu J, Shi H. 2017. Microplastics and mesoplastics in fish from coastal and fresh waters of China. Environmental Pollution 221: 141–149.                                              | Biota        | Fish          | fish; ingestion; marine debris; mesoplastics; microplastics                                  |
| Jiang P, Zhao S, Zhu L, Li D. 2018b. Microplastic-associated bacterial assemblages in the intertidal zone of the Yangtze Estuary. Science of the Total Environment 624: 48–54.                                             | Biota        | Microorganism | plastic marine debris; microplastic; 16s rRNA; plastisphere; pathogens; China                |
| Li H, La Guardia MJ, Liu H, Hale RC, Mainor TM, Harvey E, Sheng G, Fu J. 2019a. Brominated and organophosphate flame retardants along a sediment transect encompassing the Guiyu, China e-waste recycling zone. Science of | Substrate    | Sediment      | circuit board; flame retardants; polymer additive; risk characterization; source             |

|                                                                                                                                                                                                                                                                                   |            |               |                                                                        |
|-----------------------------------------------------------------------------------------------------------------------------------------------------------------------------------------------------------------------------------------------------------------------------------|------------|---------------|------------------------------------------------------------------------|
| the Total Environment 646: 58–67.                                                                                                                                                                                                                                                 |            |               | attribution                                                            |
| Li H, Ma L, Lin L, Ni Z, Xu X, Shi H, Yan Y, Zheng G, Rittschof D. 2018a. Microplastics in oysters <i>Saccostrea cucullata</i> along the Pearl River. Environmental Pollution 236: 619–625.                                                                                       | Biota      | Bivalve       | microplastics; oyster; estuary                                         |
| Li J, Qu X, Su L, Zhang W, Yang D, Kolandhasamy P, Li D, Shi H. 2016. Microplastics in mussels along the coastal waters of China. Environmental Pollution 214: 177–184.                                                                                                           | Biota      | Bivalve       | biomonitoring; microplastic; mussels; seafood                          |
| Li J, Yang D, Li L, Jabeen K, Shi H. 2015. Microplastics in commercial bivalves from China. Environmental Pollution 207: 190–195.                                                                                                                                                 | Biota      | Bivalve       | microplastic; bivalve; seafood; human health                           |
| Li W, Zhang Y, Wu N, Zhao Z, Xu W, Ma Y, Niu Z. 2019. Colonization Characteristics of Bacterial Communities on Plastic Debris Influenced by Environmental Factors and Polymer Types in the Haihe Estuary of Bohai Bay, China. Environmental Science & Technology 53: 10763–10773. | Biota      | Microorganism | no keywords listed                                                     |
| Luo H, Xiang Y, He D, Li Y, Zhao Y, Wang S, Pan X. 2019. Leaching behavior of fluorescent additives from Microplastics and the toxicity of leachate to <i>Chlorella vulgaris</i> . Science of the Total Environment 678: 1–9.                                                     | Biota      | Microorganism | additives; ecotoxicology; leaching behavior; microalgae; microplastics |
| Many kinds of Microplastics are found in the atmospheric environment of coastal cities and their deposition fluxes[1]周倩,田崇国,骆永明.滨海城市大气环境中发现多种微塑料及其沉降通量差异.科学通报,2017,62(33):3902-3909.                                                                                              | Substrate  | Atmospheric   | no english keywords listed                                             |
| Microplastics and their ecological effects in water environment陈彪,汪羚,李达, et al. 水环境中的微塑料及其生态效应[J]. 生态毒理学报, 2019(1):30-40.                                                                                                                                                         | Effect     | Biological    | no english keywords listed                                             |
| Microplastics in the environment and their effects on human health张思梦,查金,孟伟, et al. 环境中的微塑料及其对人体健康的影响[J]. 中国塑料, 2019, 33(04):85-92.                                                                                                                                               | Governance | Governance    | no english keywords listed                                             |
| Migration, transformation and environmental effects of Microplastics in terrestrial water environment刘治君,杨凌肖,王琼, et al. 微塑料在陆地水环境中的迁移转化与环境效应[J]. 环境科学与技术, 2018, v.41(04):66-72+97.                                                                                                | Substrate  | Water         | no english keywords listed                                             |

|                                                                                                                                                                                                                                                                                                              |        |              |                                                                                 |
|--------------------------------------------------------------------------------------------------------------------------------------------------------------------------------------------------------------------------------------------------------------------------------------------------------------|--------|--------------|---------------------------------------------------------------------------------|
| Mohsen M, Wang Q, Zhang L, Sun L, Lin C, Yang H. 2019. Microplastic ingestion by the farmed sea cucumber <i>Apostichopus japonicus</i> in China. Environmental Pollution 245:1071–8. Available from: <a href="https://doi.org/10.1016/j.envpol.2018.11.083">https://doi.org/10.1016/j.envpol.2018.11.083</a> | Biota  | Echinoderm   | sea cucumber; microplastics ingestion; deposit feeder; coelomic fluid; sediment |
| Ng CKY, Ang PO, Russell DJ, Balazs GH, Murphy MB. 2016. Marine Macrophytes and Plastics Consumed by Green Turtles ( <i>Chelonia mydas</i> ) in Hong Kong, South China Sea Region. Chelonian Conservation and Biology 15: 289–292.                                                                            | Biota  | Turtle       | no keywords listed                                                              |
| Nie H, Wang J, Xu K, Huang Y, Yan M. 2019. Microplastic pollution in water and fish samples around Nanxun Reef in Nansha Islands, South China Sea. Science of the Total Environment 696: 1–7.                                                                                                                | Biota  | Fish         | microplastic; microbeads; surface water; fish; Nansha Islands                   |
| Pollution and ecological effects of Marine Microplastics 谢弘晟.<br>海洋微塑料的污染及生态效应[J]. 资源节约与环保, 2018(12).                                                                                                                                                                                                        | Effect | Toxicology   | no english keywords listed                                                      |
| Qu X, Su L, Li H, Liang M, Shi H. 2018. Assessing the relationship between the abundance and properties of Microplastics in water and in mussels. Science of the Total Environment 621: 679–686.                                                                                                             | Biota  | Bivalve      | accumulation; man-made fiber; marine environment; microplastic; mussel          |
| Research advances on ecological effects of Microplastic pollution in the marine environment 刘强, 徐旭丹, 黄伟, et al.<br>海洋微塑料污染的生态效应研究进展[J]. 生态学报, 2017, 37(22):7397-7409.                                                                                                                                        | Effect | Toxicology   | no english keywords listed                                                      |
| Research advances on the occurrence, sources and ecotoxicological effects of Microplastics in freshwater environment 丁剑楠, 张闪闪, 邹华, et al.<br>淡水环境中微塑料的赋存、来源和生态毒理效应研究进展[J]. 生态环境学报, 2017(9).                                                                                                                  | Effect | Toxicology   | no keywords listed                                                              |
| Research progress on adsorption behavior and biological effects of Microplastics 屈沙沙, 朱会卷, 刘锋平, et al.<br>微塑料吸附行为及对生物影响的研究进展[J]. 环境卫生学杂志, 2017(01):81-84.                                                                                                                                                    | Effect | Toxicology   | no english keywords listed                                                      |
| Research progress on environmental behavior and ecological toxicity of Microplastics 刘沙沙, 付建平, 郭楚玲, et al.                                                                                                                                                                                                   | Review | Contaminants | no english keywords listed                                                      |



|                                                                                                                                                                                                        |        |              |                                                                     |
|--------------------------------------------------------------------------------------------------------------------------------------------------------------------------------------------------------|--------|--------------|---------------------------------------------------------------------|
| <p>微塑料的环境行为及其生态毒性研究进展[J]. 农业环境科学学报, 2019, 38(05):7-19.</p> <p>Research progress on the combined action of Microplastics and pollutants in water张哥, 邹亚丹, 徐擎擎, et al.</p>                                | Review | Plastic      | no english keywords listed                                          |
| <p>微塑料与水中污染物的联合作用研究进展[J]. 海洋湖沼通报, 2019, 167(02):61-71.</p> <p>Research progress on the combined toxicity of Microplastics and pesticide pollution邹亚丹, 徐擎擎, 张哥, et al.</p>                              | Effect | Toxicology   | no english keywords listed                                          |
| <p>微塑料与农药污染的联合毒性作用研究进展[J]. 生态毒理学报, 2017, 12(4):25-33.</p> <p>Research progress on toxic effects of Microplastics on microalgae王素春, 刘光洲, 张欢, et al. 微塑料对微藻的毒性效应研究进展[J]. 海洋环境科学, 38(2).</p>              | Effect | Toxicology   | no english keywords listed                                          |
| <p>Shen M, Zhang Y, Zhu Y, Song B, Zeng G, Hu D, Wen X, Ren X. 2019. Recent advances in toxicological research of nanoplastics in the environment: A review. Environmental Pollution 252: 511–521.</p> | Review | Contaminants | humans; nanoplastics; organisms; toxic effects; toxicity assessment |
| <p>Study on feeding process and influence of Microplastics on freshwater zooplankton涂烨楠, 凌海波, 吴辰熙, et al.</p>                                                                                          | Biota  | Zooplankton  | no english keywords listed                                          |
| <p>淡水浮游动物摄食微塑料过程及影响研究[J]. 环境科学与技术, v.41(11):1-8.</p>                                                                                                                                                   |        |              |                                                                     |
| <p>Study on Microplastic pollution in sediments and oysters in Huang-Bohai sea冉文. 黄渤海沉积物和牡蛎体内微塑料污染现状研究[D].</p>                                                                                         | Biota  | Bivalve      | no english keywords listed                                          |
| <p>Study on Microplastics enrichment characteristics of <i>Crassostrea gigas</i> in intertidal zone around Bohai sea冉文, 滕佳, 刘永亮, et al.</p>                                                            | Biota  | Bivalve      | no english keywords listed                                          |
| <p>环渤海潮间带长牡蛎微塑料富集特征研究[J]. 海洋通报, 2018, 37(05):106-113.</p>                                                                                                                                              |        |              |                                                                     |
| <p>Study on pollution characteristics and correlation between coastal mussels and Microplastics in water bodies in China曲晓芸.</p>                                                                       | Biota  | Bivalve      | no english keywords listed                                          |

我国沿海贻贝与水体中微塑料的污染特征及其相关性研究[D].

|                                                                                                                                                                                                                                             |              |             |                                                                                               |
|---------------------------------------------------------------------------------------------------------------------------------------------------------------------------------------------------------------------------------------------|--------------|-------------|-----------------------------------------------------------------------------------------------|
| Su L, Cai H, Kolandhasamy P, Wu C, Rochman CM, Shi H. 2018. Using the Asian clam as an indicator of Microplastic pollution in freshwater ecosystems. <i>Environmental Pollution</i> 234: 347–355.                                           | Biota        | Bivalve     | microplastic; freshwater; Asian clam; bioindicator; sediment                                  |
| Su L, Deng H, Li B, Chen Q, Pettigrove V, Wu C, Shi H. 2019. The occurrence of Microplastic in specific organs in commercially caught fishes from coast and estuary area of east China. <i>Journal of Hazardous Materials</i> 365: 716–724. | Biota        | Fish        | blank control; east China; fish; microplastics; organs                                        |
| Sun X, Li Q, Zhu M, Liang J, Zheng S, Zhao Y. 2016. Ingestion of microplastics by natural zooplankton groups in the northern South China Sea. <i>Marine Pollution Bulletin</i> 115: 217–224.                                                | Biota        | Zooplankton | encounter rate; ingestion; microplastics; northern region of the South China Sea; zooplankton |
| Sun X, Liang J, Zhu M, Zhao Y, Zhang B. 2018. Microplastics in seawater and zooplankton from the Yellow Sea. <i>Environmental Pollution</i> 242: 585–595.                                                                                   | Biota        | Zooplankton | microplastics; zooplankton; the Yellow Sea; ecologically relevant metrics; repository         |
| Sun X, Liu T, Zhu M, Liang J, Zhao Y, Zhang B. 2018. Retention and characteristics of Microplastics in natural zooplankton taxa from the East China Sea. <i>Science of the Total Environment</i> 640–641: 232–242.                          | Biota        | Zooplankton | microplastics; retention; the East China Sea; zooplankton                                     |
| Teng J, Wang Q, Ran W, Wu D, Liu Y, Sun S, Liu H, Cao R, Zhao J. 2019. Microplastic in cultured oysters from different coastal areas of China. <i>Science of the Total Environment journal</i> 653: 1282–1292.                              | Biota        | Bivalve     | microplastics; oyster; coastal area; uptake                                                   |
| The combined toxic effects of polystyrene Microplastics and polybrominated diphenyl ether on <i>Chlamys farreri</i> 滕瑶.<br>聚苯乙烯微塑料和多溴联苯醚对栉孔扇贝的联合毒性效应[D].                                                                                    | Contaminants | Chemicals   | no english keywords listed                                                                    |
| Wang J, Wang M, Ru S, Liu X. 2019b. High levels of Microplastic pollution in the sediments and benthic organisms of the South Yellow Sea, China. <i>Science of the Total Environment</i> 651: 1661–1669.                                    | Substrate    | Sediment    | microplastics; sediment; benthic organism; South Yellow Sea                                   |
| Wang S, Xue N, Li W, Zhang D, Pan X, Luo Y. 2019. Selectively enrichment of antibiotics and ARGs by microplastics in river, estuary and marine waters. <i>Science of the Total Environment</i> 134594.                                      | Contaminants | Antibiotics | antibiotics; args; bacterial community; microplastics; salinity                               |
| Wang W, Gao H, Jin S, Li R, Na G. 2019. The ecotoxicological effects of Microplastics on aquatic food web, from primary producer to human: A review. <i>Ecotoxicology and Environmental Safety</i> 173: 110–117.                            | Effect       | Toxicology  | aquatic biota; associated contaminants; ecotoxicological effects; human health;               |

|                                                                                                                                                                                                                                                                                                           |              |                  |                                                                                                                                                        |
|-----------------------------------------------------------------------------------------------------------------------------------------------------------------------------------------------------------------------------------------------------------------------------------------------------------|--------------|------------------|--------------------------------------------------------------------------------------------------------------------------------------------------------|
| Wang W, Liu H, Chen F, Xia J. 2019. Research on ecotoxicology of Microplastics on freshwater aquatic organisms. <i>Environmental Pollutants and Bioavailability</i> 31: 131–137.                                                                                                                          | Review       | Toxicology       | microplastics<br>microplastics; aquatic; aquatic organisms; ecotoxicology; environments; freshwater; freshwater environments; microplastics; organisms |
| Wang Z, Chen M, Zhang L, Wang K, Yu X, Zheng Z, Zheng R. 2018. Sorption behaviors of phenanthrene on the Microplastics identified in a mariculture farm in Xiangshan Bay, southeastern China. <i>Science of the Total Environment</i> 628–629.                                                            | Contaminants | Plastisizers     | marine debris; plastic; fiber; pahs; uptake; seafood                                                                                                   |
| Xiong X, Chen X, Zhang K, Mei Z, Hao Y, Zheng J, Wu C, Wang K, Ruan Y, Lam PKS, Wang D. 2018. Microplastics in the intestinal tracts of East Asian finless porpoises ( <i>Neophocaena asiaeorientalis sunameri</i> ) from Yellow Sea and Bohai Sea of China. <i>Marine Pollution Bulletin</i> 136: 55–60. | Biota        | Dolphin/Porpoise | cetacean; finless porpoise; ingestion; microplastics                                                                                                   |
| Xu X, Wang S, Gao F, Li J, Zheng L, Sun C, He C, Wang Z, Qu L. 2019. Marine Microplastic-associated bacterial community succession in response to geography, exposure time, and plastic type in China's coastal seawaters. <i>Marine Pollution Bulletin</i> 145: 278–286.                                 | Biota        | Microorganism    | bacterial community; coastal seawater; microplastic degradation; plastisphere                                                                          |
| Zhan Z, Wang J, Peng J, Xie Q, Huang Y, Gao Y. 2016. Sorption of 3,3',4,4'-tetrachlorobiphenyl by Microplastics: A case study of polypropylene. <i>Marine Pollution Bulletin</i> 110: 559–563.                                                                                                            | Effect       | Toxicology       | capacity; microplastic; model; pcb77; polypropylene; sorption                                                                                          |
| Zhang F, Wang X, Xu J, Zhu L, Peng G, Xu P, Li D. 2019. Food-web transfer of Microplastics between wild caught fish and crustaceans in East China Sea. <i>Marine Pollution Bulletin</i> 146: 173–182.                                                                                                     | Biota        | Fish             | marine food chain; microplastic; trophic transfer; wild fish                                                                                           |
| Zhang H, Zhou Q, Xie Z, Zhou Y, Tu C, Fu C, Mi W, Ebinghaus R, Christie P, Luo Y. 2018. Occurrences of organophosphorus esters and phthalates in the Microplastics from the coastal beaches in north China. <i>Science of the Total Environment</i> 616–617: 1505–1512.                                   | Contaminants | Plastisizers     | microplastics; chemical additives; coastal beaches; source identification; spatial variation                                                           |
| Zhang P, Yan Z, Lu G, Ji Y. 2019. Single and combined effects of Microplastics and roxithromycin on <i>Daphnia magna</i> . <i>Environmental Science and Pollution Research</i> 2: 17010–17020.                                                                                                            | Effect       | Roxithromycin    | <i>Daphnia magna</i> ; integrated assessment; microplastics; oxidative stress; roxithromycin; toxicity                                                 |
| Zhang S, Song C, Zhang J, Chen Z, Zhang C, Qiu L, Chen J. 2018. Effects of micro-                                                                                                                                                                                                                         | Biota        | Fish             | micro-plastics;                                                                                                                                        |

|                                                                                                                                                                                                                                             |                  |            |                                                                                             |
|---------------------------------------------------------------------------------------------------------------------------------------------------------------------------------------------------------------------------------------------|------------------|------------|---------------------------------------------------------------------------------------------|
| plastics on sulfamethoxazole (SMZ) residues in Tilapia ( <i>Oreochromis niloticus</i> ) muscle. Journal of Ecology and Rural Environment 张石云, 宋超, 张敬卫, et al. 微塑料暴露对罗非鱼肌肉中磺胺甲唑残留的影响[J]. 生态与农村环境学报, 2018, 34(09):91-98.                      |                  |            | sulfamethoxazole; residue; tilapia; muscle                                                  |
| Zhang S, Wang J, Liu X, Qu F, Wang X, Wang X, Li Y. 2019. Trends in Analytical Chemistry microplastics in the environment: A review of analytical methods, distribution, and biological effects. Trends in Analytical Chemistry 111: 62–72. | Technique        | Review     | analytical method; microplastics; ocean; plastics; sediment; soil                           |
| Zheng K, Fan Y, Zhu Z, Chen G, Tang C, Peng X. 2019. Occurrence and Species - Specific Distribution of Plastic Debris in Wild Freshwater Fish from the Pearl River Catchment, China. Environmental Toxicology and Chemistry 38: 1504–1513.  | Biota            | Fish       | freshwater fish; habitats and feeding habits; plastic debris; species-specific distribution |
| Zhu C, Li D, Sun Y, Zheng X, Peng X, Zheng K, Hu B, Luo X, Mai B. 2019. Plastic debris in marine birds from an island located in the South China Sea. Marine Pollution Bulletin 149: 110566.                                                | Biota            | Bird spp.  | marine birds; plastic debris; South China Sea; Yongxing Island                              |
| Zhu L, Wang H, Chen B, Sun X, Qu K, Xia B. 2019. Microplastic ingestion in deep-sea fish from the South China Sea. Science of the Total Environment 677: 493–501.                                                                           | Biota            | Fish       | deep-sea; fish; ingestion; microplastics; South China Sea                                   |
| <b><u>Societal Impacts</u></b>                                                                                                                                                                                                              |                  |            |                                                                                             |
| Lin C, Nakamura S. 2019. Approaches to solving China's marine plastic pollution and CO <sub>2</sub> emission problems. Economic Systems Research 31: 143–157.                                                                               | Physical Process | Emission   | no keywords listed                                                                          |
| Shen M, Mao D, Xie H, Li C. 2019. The Social Costs of Marine Litter along the East China Sea : Evidence from Ten Coastal Scenic Spots of Zhejiang Province, China. Sustainability (Switzerland) 1–15.                                       | Governance       | Governance | social costs; marine litter; contingent valuation model; choice experiment model            |
| <b><u>Sources Distribution and Trend</u></b>                                                                                                                                                                                                |                  |            |                                                                                             |
| Abundance, morphology and spatial distribution of Microplastics in inky river sediments 亓会英, 王元元, 张大海, et al. 墨水河沉积物中微塑料的丰度、形态及其空间分布[J]. 海洋湖沼通报, 2018, 46(04):1-6.                                                                          | Substrate        | Sediment   | no english keywords listed                                                                  |

|                                                                                                                                                                                                                                                      |                  |                 |                                                                                                                        |
|------------------------------------------------------------------------------------------------------------------------------------------------------------------------------------------------------------------------------------------------------|------------------|-----------------|------------------------------------------------------------------------------------------------------------------------|
| 2019(3):69-77.                                                                                                                                                                                                                                       |                  |                 |                                                                                                                        |
| Bai M, Zhu L, An L, Peng G, Li D. 2018. Estimation and prediction of plastic waste annual input into the sea from China. <i>Acta Oceanologica Sinica</i> 37: 26–39.                                                                                  | Physical Process | Input           | China; marine; material flow analysis; plastic waste; prediction                                                       |
| Cai M, He H, Liu M, Li S, Tang G, Wang W, Huang P, Wei G, Lin Y, Chen B, Hu J, Cen Z. 2018. Lost but can't be neglected: Huge quantities of small Microplastics hide in the South China Sea. <i>Science of the Total Environment</i> 633: 1206–1216. | Substrate        | Seawater        | microplastic; distribution; seawater; inventory; marginal sea; South China Sea                                         |
| Characteristics of Microplastic pollution in water and sediment of Huanghaisangou Bay熊宽旭, 赵新月, 周倩, et al. 黄海桑沟湾水体及沉积物中微塑料污染特征研究[J]. <i>海洋环境科学</i> , 2019, 38(02):41-47+63.                                                                           | Substrate        | Water, Sediment | no english keywords listed                                                                                             |
| Characteristics of Microplastic pollution in Xiamen Bay beach刘启明, 梁海涛, 锡桂莉, et al. 厦门湾海滩微塑料污染特征[J]. <i>环境科学</i> , 2019, 40(03):209-213.                                                                                                              | Substrate        | Beach           | no english keywords listed                                                                                             |
| Chen H, Wang S, Guo H, Lin H, Zhang Y, Long Z, Huang H. 2019. Study of marine debris around a tourist city in East China: Implication for waste management. <i>Science of the Total Environment</i> 676: 278–289.                                    | Substrate        | Governance      | beached debris; benthic debris; clean coast index; floating debris; low value waste; plastic marine debris; nearshore; |
| Chen M, Jin M, Tao P, Wang Z, Xie W, Yu X, Wang K. 2018. Assessment of Microplastics derived from mariculture in Xiangshan. <i>Environmental Pollution</i> 242: 1146–1156.                                                                           | Substrate        | Water, Sediment | coastal water; sediment; pollution                                                                                     |
| Cheng PK, Fok L, Hung PL, Cheung LTO. 2018. Spatio-temporal comparison of neustonic Microplastic density in Hong Kong waters under the influence of the Pearl River Estuary. <i>Science of the Total Environment</i> 628–629: 731–739.               | Substrate        | Water           | Hong Kong; microplastics; Pearl River; plastic debris; South China Sea                                                 |
| Cheung PK, Cheung LTO, Fok L. 2016. Seasonal variation in the abundance of marine plastic debris in the estuary of a subtropical macro-scale drainage basin in South China. <i>Science of the Total Environment</i> 562: 658–665.                    | Substrate        | Beach           | beach survey; Hong Kong; marine plastic debris; microplastics; Pearl River; seasonal variation                         |
| Cheung PK, Fok L. 2017. Characterisation of plastic microbeads in facial scrubs and their estimated emissions in Mainland China. <i>Water Research</i> 122: 53–61.                                                                                   | Governance       | Emission        | China; emission; microbeads; microplastics; personal care and cosmetic products; sewage                                |

|                                                                                                                                                                                                                       |           |                 |                                                                         |
|-----------------------------------------------------------------------------------------------------------------------------------------------------------------------------------------------------------------------|-----------|-----------------|-------------------------------------------------------------------------|
| Cheung PK, Hung PL, Fok L. 2019. River Microplastic Contamination and Dynamics upon a Rainfall Event in Hong Kong, China. <i>Environmental Processes</i> 6: 253–264.                                                  | Substrate | Rain            | treatment<br>microplastics; plastic debris; river; South China          |
| Dai Z, Zhang H, Zhou Q, Tian Y, Chen T, Tu C. 2018. Occurrence of Microplastics in the water column and sediment in an inland sea affected by intensive anthropogenic activities. <i>Environmental Pollution</i> 1–9. | Substrate | Water, Sediment | Bohai Sea; microplastics; sediment; vertical distribution; water column |
| Di M, Wang J. 2018. Microplastics in surface waters and sediments of the Three Gorges. <i>Science of the Total Environment</i> 616–617: 1620–1627.                                                                    | Substrate | Water           | freshwater; pollutant; RAMAN spectroscopy; TGR                          |
| Ding L, Guo X, Yang X, Zhang Q, Yang C. 2019. Microplastics in surface waters and sediments of the Wei River, in the northwest of China. <i>Science of the Total Environment</i> 667: 427–434.                        | Substrate | Water           | microplastics; abundance; surface water; sediment; Wei River            |
| Distribution and composition of Microplastics in the surface seawater of east China sea刘涛, 孙晓霞, 朱明亮, et al.<br>东海表层海水中微塑料分布与组成[J]. <i>海洋与湖沼</i> , 2018.                                                               | Substrate | Seawater        | no english keywords listed                                              |
| Distribution and sedimentation characteristics of Microplastics in surface sediments of tidal flat of Changjiang estuary朱晓桐, 衣俊, 强丽媛, et al.<br>长江口潮滩表层沉积物中微塑料的分布及沉降特点[J]. <i>环境科学</i> , 2018, v.39(05):99-106.       | Substrate | Sediment        | no keywords listed                                                      |
| Distribution characteristics and source of sediment Microplastics in the section of Lean-Poyang Lake周隆胤, 简敏菲, 余厚平, et al. 乐安河—鄱阳湖段底泥微塑料的分布特征及其来源[J]. <i>土壤学报</i> , 2018, 55(05):185-195.                              | Substrate | Sediment        | no english keywords listed                                              |
| Distribution characteristics of Microplastics in 4 bathing beaches in Qingdao罗雅丹, 林千惠, 贾芳丽, et al.<br>青岛4个海水浴场微塑料的分布特征[J]. <i>环境科学</i> , 2019, 40(06):141-148.                                                        | Substrate | Water, Sediment | no english keywords listed                                              |
| Eutrophication evaluation of Xiaxin wharf water body in Dongting Lake district and characteristics of Microplastic pollution冯志桥, 钟伟, 罗鑫, et al.<br>洞庭湖区下新码头水体富营养化评价及微塑料污染特征研究[J].                                     | Substrate | Water           | no english keywords listed                                              |

环境保护与循环经济, 2019, 39(04):50-53.

|                                                                                                                                                                                                                                                                                                       |            |                 |                                                                                              |
|-------------------------------------------------------------------------------------------------------------------------------------------------------------------------------------------------------------------------------------------------------------------------------------------------------|------------|-----------------|----------------------------------------------------------------------------------------------|
| Fan Y, Zheng K, Zhu Z, Chen G, Peng X. 2019. Distribution, sedimentary record, and persistence of Microplastics in the Pearl River catchment, China. <i>Environmental Pollution</i> 251: 862–870.                                                                                                     | Substrate  | Sediment        | microplastics; river; sedimentary core; vertical distribution; spatial and seasonal patterns |
| Fok L, Cheung PK, Tang G, Li WC. 2017. Size distribution of stranded small plastic debris on the coast of Guangdong, South China. <i>Environmental Pollution</i> 220: 407–412.                                                                                                                        | Substrate  | Coast           | marine plastic debris; size distribution; fragmentation; beach; China                        |
| Fok L, Cheung PK. 2015. Hong Kong at the Pearl River Estuary: A hotspot of Microplastic pollution. <i>Marine Pollution Bulletin</i> 99: 112–118.                                                                                                                                                      | Substrate  | Beach           | abundance; beach survey; Hong Kong; marine debris; microplastics; Pearl River Estuary        |
| Fok L, Wing T, Lam L, Li H, Xu X. 2019b. A meta-analysis of methodologies adopted by Microplastic studies in China. <i>Science of the Total Environment</i> 135371.                                                                                                                                   | Technique  | Sampling        | microplastics; methodologies; sample collection; sample processing procedures; China         |
| Investigation and analysis of Microplastic particles in sediments of Fuxi River张耀丹, 李锡鹏, 王旭, et al. 釜溪河沉积物微塑料颗粒调查分析的研究[J]. <i>四川环境</i> , 2019, 38(02):50-56.                                                                                                                                          | Substrate  | Sediment        | no english keywords listed                                                                   |
| Jiang C, Yin L, Wen X, Du C, Wu L, Long Y, Liu Y, Ma Y, Yin Q, Zhou Z, Pan H. 2018a. Microplastics in Sediment and Surface Water of West Dongting Lake and South Dongting Lake: Abundance, Source and Composition. <i>International Journal of Environmental Research and Public Health</i> 15: 1–15. | Substrate  | Water, Sediment | Dongting Lake; microplastic; sediment; surface water                                         |
| Li J, Zhang H, Zhang K, Yang R, Li R, Li Y. 2018. Characterization, source, and retention of Microplastic in sandy beaches and mangrove wetlands of the Qinzhou Bay, China. <i>Marine Pollution Bulletin</i> 136: 401–406.                                                                            | Substrate  | Beach           | aquaculture; beach; mangrove; microplastics; retention                                       |
| Li R, Zhang L, Xue B, Wang Y. 2019. Abundance and characteristics of Microplastics in the mangrove sediment of the semi-enclosed Maowei Sea of the South China sea: New implications for location, rhizosphere, and sediment composition. <i>Environmental Pollution</i> 244: 685–692.                | Substrate  | Sediment        | microplastics; semi-enclosed Maowei Sea; mangrove sediment                                   |
| Li X, Chen L, Mei Q, Dong B, Dai X, Ding G, Zeng EY. 2018. Microplastics in sewage sludge from the wastewater treatment plants in China. <i>Water</i>                                                                                                                                                 | Governance | WWTP            | microplastic pollutants; sludge disposal; land application;                                  |

|                                                                                                                                                                                                                                                         |              |                 |                                                                                                                  |
|---------------------------------------------------------------------------------------------------------------------------------------------------------------------------------------------------------------------------------------------------------|--------------|-----------------|------------------------------------------------------------------------------------------------------------------|
| Research 142: 75–85.                                                                                                                                                                                                                                    |              |                 | WWTP parameters; spatial distribution; temporal distribution                                                     |
| Lin L, Zuo L, Peng J, Cai L, Fok L, Yan Y, Li H, Xu X. 2018. Occurrence and distribution of Microplastics in an urban river: A case study in the Pearl River along Guangzhou City, China. <i>Science of the Total Environment Journal</i> 644: 375–381. | Substrate    | Water, Sediment | microplastics; surface water; sediment; pearl river; wastewater treatment plants                                 |
| Liu S, Jian M, Zhou L, Li W. 2019. Distribution and characteristics of Microplastics in the sediments of Poyang Lake. <i>Water Science &amp; Technology</i> 79: 1868–1877.                                                                              | Substrate    | Sediment        | no keywords listed                                                                                               |
| Lo HS, Xu X, Wong CY, Cheung SG. 2018. Comparisons of Microplastic pollution between mudflats and sandy beaches in Hong Kong. <i>Environmental Pollution</i> 236: 208–217                                                                               | Substrate    | Sediment        | marine debris; microplastic; mudflats; sandy beaches                                                             |
| Luo W, Su L, Craig NJ, Du F, Wu C, Shi H. 2019. Comparison of Microplastic pollution in different water bodies from urban creeks to coastal waters. <i>Environmental Pollution</i> 246: 174–182.                                                        | Substrate    | Water, Sediment | microplastics; freshwater; small water bodies; river networks                                                    |
| Ma Y, Huang A, Cao S, Sun F, Wang L, Guo H, Ji R. 2016. Effects of nanoplastics and Microplastics on toxicity, bioaccumulation, and environmental fate of phenanthrene in fresh water. <i>Environmental Pollution</i> 219: 166–173.                     | Effect       | Toxicology      | microplastics; nanoplastics; phenanthrene; Joint toxicity; bioaccumulation; environmental fate                   |
| Mai L, Bao L, Shi L, Liu L, Zeng EY. 2018. Polycyclic aromatic hydrocarbons affiliated with Microplastics in surface waters of Bohai and Huanghai Seas, China. <i>Environmental Pollution</i> 241: 834–840.                                             | Contaminants | Chemicals       | microplastics; polycyclic aromatic hydrocarbons; pretreatment; sorption; fate and transport; oceanic environment |
| Mu J, Qu L, Jin F, Zhang S, Fang C, Ma X, Zhang W, Huo C, Cong Y, Wang J. 2019. Abundance and distribution of microplastics in the surface sediments from the northern Bering and Chukchi Seas. <i>Environmental Pollution</i> 245: 122–130.            | Substrate    | Sediment        | Arctic; microplastics; polar region; sediment; µftir                                                             |
| Pan Z, Guo H, Chen H, Wang S, Sun X, Zou Q, Zhang Y, Lin H, Cai S, Huang J. 2019. Microplastics in the Northwestern Pacific: Abundance, distribution, and characteristics. <i>Science of the Total Environment</i> 650: 1913–1922.                      | Substrate    | Ocean           | abundance; chemical fingerprint; distribution; microplastic; Northwestern Pacific                                |



|                                                                                                                                                                                                                                                  |            |            |                                                                                   |
|--------------------------------------------------------------------------------------------------------------------------------------------------------------------------------------------------------------------------------------------------|------------|------------|-----------------------------------------------------------------------------------|
| Peng G, Xu P, Zhu B, Bai M, Li D. 2018. Microplastics in freshwater river sediments in Shanghai, China : A case study of risk assessment in megacities. Environmental Pollution 234: 448–456.                                                    | Substrate  | Sediment   | microplastic; freshwater; risk assessment; FT-IR; pollution                       |
| Peng G, Zhu B, Yang D, Su L, Shi H, Li D. 2017. Microplastics in sediments of the Changjiang Estuary, China Environmental Pollution 225: 283–290.                                                                                                | Substrate  | Sediment   | microplastic; sediment; Changjiang Estuary; $\mu$ -FT-IR; marine pollution        |
| Phuong NN, Zalouk-Vergnoux A, Poirier L, Kamari A, Châtel A, Mouneyrac C, Lagarde F. 2016. Is there any consistency between the Microplastics found in the field and those used in laboratory experiments? Environmental Pollution 211: 111–123. | Technique  | Sampling   | biological effects; field samples; ingestion; laboratory exposures; microplastics |
| Qiu Q, Peng J, Yu X, Chen F, Wang J, Dong F. 2015. Occurrence of Microplastics in the coastal marine environment : First observation on sediment of China. Marine Pollution Bulletin 98: 274–280.                                                | Substrate  | Sediment   | microplastics; China; fluorescence microscope FTIR; sediment                      |
| Qiu Q, Tan Z, Wang J, Peng J, Li M, Zhan Z. 2016. Extraction, enumeration and identification methods for monitoring Microplastics in the environment. Estuarine, Coastal and Shelf Science 176: 102–109.                                         | Technique  | Sampling   | sediment; seawater; organism; quality; quantity                                   |
| Separation and surface morphology of Microplastics in the sediment of wetland in Poyang Lake - Raohe section<br>简敏菲,周隆胤,余厚平,刘淑丽.鄱阳湖-饶河入湖段湿地底泥中微塑料的分离及其表面形貌特征.环境科学学报,2018,38(2):579-586.                                                          | Technique  | Plastic    | no english keywords listed                                                        |
| Separation of Microplastics from a coastal soil and their surface microscopic features[1]周倩,章海波,周阳,李远,薛勇,付传城,涂晨,骆永明.滨海潮滩土壤中微塑料的分离及其表面微观特征.科学通报,2016(14):1604-1611.                                                                               | Technique  | Sampling   | no english keywords listed                                                        |
| Shanghai Rendu Ocean NPO Development Centre. Fishery and Aquaculture Marine Debris Survey Report --in the Yellow Sea Area of China. 2019.                                                                                                        | Governance | Governance | fishery-based, beach litter, Yellow Sea area, citizen science, China              |
| Spatiotemporal distribution and risk assessment of Microplastics in Yangtze estuary徐沛, 彭谷雨, 朱礼鑫, et al. 长江口微塑料时空分布及风险评价[J]. 中国环境科学, 2019, 39(05):281-287.                                                                                        | Substrate  | Sediment   | no english keywords listed                                                        |
| Su L, Xue Y, Li L, Yang D, Kolandhasamy P, Li D, Shi H. 2016. Microplastics in                                                                                                                                                                   | Substrate  | Sediment   | microplastic; freshwater; Asian                                                   |

|                                                                                                                                                                                                                                                                                                                              |              |                 |                                                                                                         |
|------------------------------------------------------------------------------------------------------------------------------------------------------------------------------------------------------------------------------------------------------------------------------------------------------------------------------|--------------|-----------------|---------------------------------------------------------------------------------------------------------|
| Taihu Lake, China. Environmental Pollution 216: 711–719.                                                                                                                                                                                                                                                                     |              |                 | clam; biomonitoring                                                                                     |
| Tan X, Yu X, Cai L, Wang J, Peng J. Microplastics and associated PAHs in surface water from the Feilaixia Reservoir in the Beijiang River, China. Chemosphere [Internet]. 2019;221:834–40. Available from: <a href="https://doi.org/10.1016/j.chemosphere.2019.01.022">https://doi.org/10.1016/j.chemosphere.2019.01.022</a> | Substrate    | Water           | microplastics; pahs; GC-MS; Feilaixia Reservoir; surface water                                          |
| Tang G, Liu M, Zhou Q, He H, Chen K, Zhang H, Hu J, Huang Q, Luo Y, Ke H, Chen B, Xu X, Cai M. 2018. Microplastics and polycyclic aromatic hydrocarbons (PAHs) in Xiamen coastal areas : Implications for anthropogenic impacts. Science of the Total Environment 634: 811–820.                                              | Contaminants | Chemicals       | cluster analysis; correlation analysis; human activities; microplastics; pops; Southeast China          |
| The characteristics of Microplastics in the surface soil of Zhangpu coastal area of Fujian province邓加聪, 陈晓凤, 张志鹏, et al. 福建漳浦近岸海域表层土壤中微塑料的赋存特征[J]. 福建师大福清分校学报, 2019, 153(02):80-88.                                                                                                                                          | Substrate    | Coast           | no english keywords listed                                                                              |
| Tsang YY, Mak CW, Liebich C, Lam SW, Sze ETP, Chan KM. 2017. Microplastic pollution in the marine waters and sediments of Hong Kong. Marine Pollution Bulletin 115: 20–28.                                                                                                                                                   | Substrate    | Water, Sediment | coastal waters; plastic pollution; sediments; spatial variation; temporal variation                     |
| Wang J, Lu L, Wang M, Jiang T, Liu X, Ru S. 2019a. Typhoons increase the abundance of Microplastics in the marine environment and cultured organisms : A case study in Sanggou Bay, China. Science of the Total Environment 667: 1–8.                                                                                        | Substrate    | Seawater        | microplastic; typhoon; Sanggou Bay; oyster; scanning electron microscopy/energy dispersive spectroscopy |
| Wang J, Peng J, Tan Z, Gao Y, Zhan Z, Chen Q, Cai L. 2017. Microplastics in the surface sediments from the Beijiang River littoral zone: Composition, abundance, surface textures and interaction with heavy metals. Chemosphere 171: 248–258.                                                                               | Substrate    | Sediment        | microplastics; Beijiang River; sediments; $\mu$ -FTIR; sem/eds; ICP-MS                                  |
| Wang J, Zheng L, Li J. 2018. A critical review on the sources and instruments of marine Microplastics and prospects on the relevant management in China. Waste Management and Research 36: 898–911.                                                                                                                          | Review       | Substrate       | microplastics; instruments; marine environment; proposals/solutions; sources abundance; impact;         |
| Wang MH, He Y, Sen B. 2019. Research and management of plastic pollution in coastal environments of China. Environmental Pollution 248: 898–905.                                                                                                                                                                             | Review       | Governance      | management; marine; microplastic; plastic debris                                                        |
| Wang T, Zou X, Li B, Yao Y, Li J, Hui H, Yu W, Wang C. 2018. Microplastics in a wind farm area: A case study at the Rudong Offshore Wind Farm, Yellow                                                                                                                                                                        | Substrate    | Water, Sediment | bed shear stress; human activity; microplastic;                                                         |

|                                                                                                                                                                                                                                                                      |           |          |                                                                                                                   |
|----------------------------------------------------------------------------------------------------------------------------------------------------------------------------------------------------------------------------------------------------------------------|-----------|----------|-------------------------------------------------------------------------------------------------------------------|
| Sea, China. Marine Pollution Bulletin 128: 466–474.                                                                                                                                                                                                                  |           |          | offshore wind farm; Yellow Sea                                                                                    |
| Wang T, Zou X, Li B, Yao Y, Zang Z, Li Y, Yu W, Wang W. 2019. Preliminary study of the source apportionment and diversity of Microplastics: Taking floating Microplastics in the South China Sea as an example. Environmental Pollution 245: 965–974.                | Technique | Sampling | microplastic; source apportionment; source-specific classification; microplastic diversity index; South China Sea |
| Wang W, Ndungu AW, Li Z, Wang J. 2017. Microplastics pollution in inland freshwaters of China : A case study in urban surface waters of Wuhan, China. Science of the Total Environment, The 575: 1369–1374.                                                          | Substrate | Water    | microplastics; pollution; urban surface waters; Wuhan                                                             |
| Wang W, Wang J. 2018. Investigation of Microplastics in aquatic environments: An overview of the methods used, from field sampling to laboratory analysis. Trends in Analytical Chemistry 108: 195–202.                                                              | Technique | Sampling | aquatic environment; detection; methods; microplastics; quality control and quality assurance                     |
| Wang W, Yuan W, Chen Y, Wang J. 2018c. Microplastics in surface waters of Dongting Lake and Hong Lake, China. Science of the Total Environment 633: 539–545.                                                                                                         | Substrate | Water    | microplastics; inland freshwater; abundance; morphological property; chemical component                           |
| Wang Z, Qin Y, Li W, Yang W, Meng Q, Yang J. 2019. Microplastic contamination in freshwater : first observation in Lake Ulansuhai, Yellow River Basin, China. Environmental Chemistry Letters 17: 1821–1830.                                                         | Substrate | Water    | microplastic; contamination; freshwater; Yellow River Hetao irrigation district; Lake Ulansuhai                   |
| Wang Z, Su B, Xu X, Di D, Huang H, Mei K, Dahlgren RA, Zhang M, Shang X. 2018. Preferential accumulation of small (<300 µm) Microplastics in the sediments of a coastal plain river network in eastern China. Waters Research.                                       | Substrate | Sediment | no keywords listed                                                                                                |
| Wen X, Du C, Xu P, Zeng G, Huang D, Yin L, Yin Q, Hu L, Wan J, Zhang J, Tan S, Deng R. 2018. Microplastic pollution in surface sediments of urban water areas in Changsha, China : Abundance, composition, surface textures. Marine Pollution Bulletin 136: 414–423. | Substrate | Sediment | Changsha; china; microplastic; surface sediment; urban water areas                                                |
| Wu F, Pennings SC, Tong C, Xu Y. 2020. Variation in Microplastics composition at small spatial and temporal scales in a tidal flat of the Yangtze Estuary, China. Science of the Total Environment 699: 134252.                                                      | Substrate | Sediment | intertidal zone; hydrological processes; microplastics pollution; sediment; small                                 |

|                                                                                                                                                                                                                                                    |           |                 | scale                                                                          |
|----------------------------------------------------------------------------------------------------------------------------------------------------------------------------------------------------------------------------------------------------|-----------|-----------------|--------------------------------------------------------------------------------|
| Wu N, Zhang Y, Zhang X, Zhao Z, He J, Li W, Ma Y, Niu Z. 2019. Occurrence and distribution of Microplastics in surface water and sediments of two typical estuaries in Bohai Bay, China. <i>Environmental Science Processes and Impacts</i> 1–9.   | Substrate | Water, Sediment | no keywords listed                                                             |
| Xiong X, Wu C, Elser JJ, Mei Z, Hao Y. 2019. Occurrence and fate of Microplastic debris in middle and lower reaches of the Yangtze River – From inland to the sea. <i>Science of the Total Environment</i> 659: 66–73.                             | Substrate | Water           | microplastics; Yangtze River; transport                                        |
| Xiong X, Zhang K, Chen X, Shi H, Luo Z, Wu C. 2018. Sources and distribution of Microplastics in China’s largest inland lake – Qinghai Lake. <i>Environmental Pollution</i> 235: 899–906.                                                          | Substrate | Water           | lake current; plastic debris; remote lake; tourism; weathering                 |
| Xu P, Peng G, Su L, Gao Y, Gao L, Li D. 2018. Microplastic risk assessment in surface waters : A case study in the Changjiang Estuary, China. <i>Marine Pollution Bulletin</i> 133: 647–654.                                                       | Substrate | Water           | no keywords listed                                                             |
| Yan M, Nie H, Xu K, He Y, Hu Y. 2019. Microplastic abundance, distribution and composition in the Pearl River along Guangzhou city and Pearl River estuary, China. <i>Chemosphere</i> 217: 879–886.                                                | Substrate | Water           | biomonitor; fiber                                                              |
| Yin L, Jiang C, Wen X, Du C, Zhong W, Feng Z, Long Y, Ma Y. 2019. Microplastic Pollution in Surface Water of Urban Lakes in Changsha, China. <i>International Journal of Environmental Research and Public Health</i> Article 16: 2–10.            | Substrate | Water           | microplastic; Changsha; urban lakes; surface water; pollution                  |
| Yu X, Peng J, Wang J, Wang K, Bao S. 2016. Occurrence of Microplastics in the beach sand of the Chinese inner sea: the Bohai Sea. <i>Environmental Pollution</i> 214: 722–730.                                                                     | Substrate | Beach           | contaminant; plastic; Chinese coast; Bohai Bay                                 |
| Yuan W, Liu X, Wang W, Di M, Wang J. 2019. Microplastic abundance, distribution and composition in water, sediments, and wild fish from Poyang Lake, China. <i>Ecotoxicology and Environmental Safety</i> 170: 180–187.                            | Substrate | Reef            | <i>Carassius auratus</i> ; freshwater; microplastics; sediment; surface water  |
| Zhang B, Wu D, Yang X, Teng J, Liu Y, Zhang C, Zhao J, Yin X, You L, Liu Y, Wang Q. 2019. Microplastic pollution in the surface sediments collected from Sishili Bay, North Yellow Sea, China. <i>Marine Pollution Bulletin</i> journal 141: 9–15. | Substrate | Sediment        | Microplastics; surface sediments; Sishili Bay; Yellow Sea; pollution level     |
| Zhang C, Zhou H, Cui Y, Wang C, Li Y, Zhang D. 2019. Microplastics in offshore sediment in the Yellow Sea and East China. <i>Environmental Pollution</i> 244: 827–833.                                                                             | Substrate | Sediment        | marine pollution; microplastics; offshore sediments; southern Yellow Sea; East |

|                                                                                                                                                                                                                                                        |           |                 |                                                                                                  |
|--------------------------------------------------------------------------------------------------------------------------------------------------------------------------------------------------------------------------------------------------------|-----------|-----------------|--------------------------------------------------------------------------------------------------|
| Zhang J, Zhang C, Deng Y, Wang R, Bai J, Wu J, Zhou Y, Wang J. 2019. Microplastics in the surface water of small-scale estuaries in Shanghai. <i>Marine Pollution Bulletin</i> 149: 110569.                                                            | Substrate | Water           | China Sea<br>microplastics; small-scale estuary; Shanghai; surface water                         |
| Zhang K, Gong W, Lv J, Xiong X, Wu C. 2015. Accumulation of floating Microplastics behind the Three Gorges Dam. <i>Environmental Pollution</i> 204: 117–123.                                                                                           | Substrate | Water           | no keywords listed                                                                               |
| Zhang K, Shi H, Peng J, Wang Y, Xiong X, Wu C, Lam PKS. 2018. Microplastic pollution in China’s inland water systems: A review of findings, methods, characteristics, effects, and management. <i>Science of the Total Environment</i> 630: 1641–1653. | Review    | Substrate       | China; inland water; management; microplastics; sources                                          |
| Zhang K, Su J, Xiong X, Wu X, Wu C, Liu J. 2016. Microplastic pollution of lakeshore sediments from remote lakes in Tibet plateau, China. <i>Environmental Pollution</i> 219: 450–455.                                                                 | Substrate | Sediment        | microplastics; northern Tibet; lakeshore sediment; distribution; identification; surface texture |
| Zhang K, Xiong X, Hu H, Wu C, Bi Y, Wu Y, Zhou B, Lam PKS, Liu J. 2017. Occurrence and Characteristics of Microplastic Pollution in Xiangxi Bay of Three Gorges Reservoir, China. <i>Environmental Science and Technology</i> 51: 3794–3801.           | Substrate | Water           | no keywords listed                                                                               |
| Zhang L, Liu J, Xie Y, Zhong S, Yang B, Lu D, Zhong Q. 2019. Distribution of Microplastics in surface water and sediments of Qin river in Beibu Gulf, China. <i>Science of the Total Environment</i> 2–9.                                              | Substrate | Water, Sediment | microplastics; surface water; sediment; Qin River; human activities                              |
| Zhang W, Ma X, Zhang Z, Wang Y, Wang J, Wang J, Ma D. 2015. Persistent organic pollutants carried on plastic resin pellets from two beaches in China. <i>Marine Pollution Bulletin</i> 99: 28–34.                                                      | Substrate | Beach           | microplastics; OCPs; PAHs; PCBs                                                                  |
| Zhang W, Zhang S, Wang J, Wang Y, Mu J, Wang P, Lin X, Ma D. 2017. Microplastic pollution in the surface waters of the Bohai Sea, China. <i>Environmental Pollution</i> 231: 541–548.                                                                  | Substrate | Water           | microplastic; the Bohai Sea; floating; plastic                                                   |
| Zhao J, Ran W, Teng J, Liu Y, Liu H, Yin X, Cao R, Wang Q. 2018. Microplastic pollution in sediments from the Bohai Sea and the Yellow Sea, China. <i>Science of the Total Environment</i> 640–641: 637–645.                                           | Substrate | Sediment        | microplastic; Yellow Sea; Bohai Sea; sediment                                                    |
| Zhao S, Wang T, Zhu L, Xu P, Wang X, Gao L, Li D. 2019. Analysis of suspended Microplastics in the Changjiang Estuary : Implications for riverine plastic load                                                                                         | Substrate | Water           | plastic debris; microplastic; plastic loads; river;                                              |

|                                                                                                                                                                                                                                              |           |                 |                                                   |  |  |                                                                                                                                       |
|----------------------------------------------------------------------------------------------------------------------------------------------------------------------------------------------------------------------------------------------|-----------|-----------------|---------------------------------------------------|--|--|---------------------------------------------------------------------------------------------------------------------------------------|
|                                                                                                                                                                                                                                              |           |                 | to the ocean. <i>Water Research</i> 161: 560–569. |  |  | Changjiang Estuary; East China Sea                                                                                                    |
| Zhao S, Zhu L, Li D. 2015. Characterization of small plastic debris on tourism beaches around the South China Sea. <i>Regional Studies in Marine Science</i> 1: 55–62.                                                                       | Substrate | Beach           |                                                   |  |  | beaches; polymer composition; RAMAN spectroscopy; small plastic debris; South China Sea                                               |
| Zhao S, Zhu L, Li D. 2015. Microplastic in three urban estuaries, China. <i>Environmental Pollution</i> 206: 597–604.                                                                                                                        | Substrate | Water           |                                                   |  |  | microplastic estuary; typhoon; RAMAN spectroscopy; pollution                                                                          |
| Zhao S, Zhu L, Wang T, Li D. 2014. Suspended Microplastics in the surface water of the Yangtze Estuary System, China: First observations on occurrence, distribution. <i>Marine Pollution Bulletin</i> 86: 562–568.                          | Substrate | Water           |                                                   |  |  | East China Sea; marine debris; suspended microplastic; Yangtze Estuary                                                                |
| Zheng Y, Li J, Cao W, Liu X, Jiang F, Ding J. 2019. Distribution characteristics of Microplastics in the seawater and sediment : A case study in Jiaozhou Bay, China. <i>Science of the Total Environment</i> 674: 27–35.                    | Substrate | Water, Sediment |                                                   |  |  | China; distribution mechanism; Jiaozhou Bay; micro-Fourier transform infrared spectrometry; microplastics; residual current; sediment |
| Zhou C, Liu X, Wang Z, Yang T, Shi L, Wang L, Cong L, Liu X, Yang J. 2015. Marine debris surveys on four beaches in Rizhao City of China. <i>Global Journal of Environmental Science and Management</i> 1: 305–314.                          | Substrate | Beach           |                                                   |  |  | abundance; beached marine debris (BMD); composition; Rizhao City; source                                                              |
| Zhou C, Liu X, Wang Z, Yang T, Shi L, Wang L, You S, Li M, Zhang C. 2016. Assessment of marine debris in beaches or seawaters around the China Seas and coastal provinces. <i>Waste Management</i> 48: 652–660.                              | Substrate | Water, Sediment |                                                   |  |  | assessment; beached marine debris (BMD); floating marine debris (FMD); source; submerged marine debris (SMD)                          |
| Zhou P, Huang C, Fang H, Cai W, Li D, Li X, Yu H. 2011. The abundance, composition and sources of marine debris in coastal seawaters or beaches around the northern South China Sea (China). <i>Marine Pollution Bulletin</i> 62: 1998–2007. | Substrate | Water           |                                                   |  |  | abundance; composition; marine debris; source; the northern South China Sea                                                           |
| Zhu J, Zhang Q, Li Y, Tan S, Kang Z, Yu X, Lan W, Cai L, Wang J, Shi H. 2018. Microplastic pollution in the Maowei Sea, a typical mariculture bay of China. <i>Science of the Total Environment</i> 1–7.                                     | Substrate | Seawater        |                                                   |  |  | Maowei Sea; microplastics; surface water; fishery products                                                                            |
| Zhu L, Bai H, Chen B, Sun X, Qu K, Xia B. 2018. Microplastic pollution in North                                                                                                                                                              | Substrate | Water, Sediment |                                                   |  |  | microplastics; surface                                                                                                                |

Yellow Sea, China: Observations on occurrence, distribution and identification. *Science of the Total Environment* 636: 20–29.

---

seawater; sediment; micro-FTIR; fishery
