# Supplementary material for: Battling the known unknowns: a synoptic review of aquatic plastics research from Australia, the United Kingdom and China
Source: Royal Society of Chemistry journal article supplement (doi:10.1039/d1em00175b), 2021-01-01
Supplement: d1em00175b2.xlsx [file d1em00175b2.xlsx]

## Sheet: Sheet1
	Supporting information, Table S2. Summary of elements in studies on beach sediments, listed by country.
	Reference	Year	Type	Period	Isl..and/Country	replicates	transect/area	Where	depth	Mass	Density seperation	Size	Chemical (FTIR/Raman)	Hard	Film	Pellet	Glass	Metal	fabric	Rubber	Expanded polystyrene	Rope	Paper/wood	Medical/sanitary	Column2	Other	Blue	Black	Red	Green	White	Transparent	Other colour	Column1
Australia	Slip, D. J. & Burton, H. R. https://doi.org/10.1017/S0376892900022177.	1991	Field survey	Twice	2 Isl.		beach	not stated	surface			not stated		y	y		y	y			y	y				Straps, drift cards, many others
	Frost, A. & Cullen, M. https://doi.org/10.1016/S0025-326X(96)00149-X.	1997	Field survey	5*monthly	4 Beach		5x10 m	water - dune		y		not stated		y			y	y					y			Fishing gear
	Haynes, D. https://doi.org/10.1016/S0025-326X(96)00179-8.	1997	Field survey	Once	12 Isl.			water - veg				>1cm		y			y	y		y	y	y				Netting
	Whiting, S. D. https://doi.org/10.1016/S0025-326X(98)00066-6	1998	Field survey	Twice	Beach	1.8 km		water - veg				not stated		y			y	y		y	y		y			Fabric
	Edyvane, K. S. et al. https://doi.org/10.1016/j.marpolbul.2003.12.012.	2004	Field survey	10*annual	Beach	26km by 1km zones				y		>2 cm		y			y	y				y				Globes, drift cards
	Nott, J. & Hubbert, G.	2005	Field survey/model	Once	7 Beach							NA	NA
	Taffs, K. H. & Cullen, M. C. https://doi.org/10.1080/14486563.2005.10648655.	2005	Field survey	Once	5 Beach	21km by 0.5km zones		water - veg				NA		y			y	y					y			Fishing, food, cigarettes
	Whiting, S.D. https://doi.org/10.1016/S0025-326X(98)00066-6	2011	Field survey	Twice	2 Isl.	all		water -storm surge				not stated	Model
	Slavin, C. et al. https://doi.org/10.1016/j.marpolbul.2012.05.018.	2012	Field survey	Once	9 Beach	3 per 50 or 100m zone	Entry and not entry	Above, below on strand		y		>5mm		y	y		y	y		y		y	y	y
	Smith, S. D. A.et al. https://doi.org/10.1016/j.marpolbul.2014.09.007.	2014	Community	Once	1 Isl.	16 sites	50 m parallel	water - veg				>5mm		y	y		y					y		y		Cigaretts, toys, caps, foil
	Duckett, P. E. & Repaci, V. https://doi.org/10.1071/MF14087.	2015	Community	Once								NA
	Wilson, S. P. & Verlis, K. M. https://doi.org/10.1016/j.marpolbul.2017.01.036.	2017	Field survey	3 annual	4 Isl.	50 m	Tourism/no tourism, windward/leeward	strand - fore dune				10 mm		y	y		y	y	y	y		y	y	y
	Brennan, E. et al. https://doi.org/10.1016/j.scitotenv.2018.06.352.	2018	Field survey	Once		2m wide transect		water - veg			capture-recapture	10 mm		y	y		y	y								Fishing
	Cunningham, A. D. J. & Wilson, S. P. https://www.jstor.org/stable/4299182	2018	Field survey	5 monthly	6 Beach, 3 zones	27*55 m 3 per zone (lower, mid, upper)						NA		y	y			y	y	y	y	y	y	y
	Smith, S. D. A. et al. https://doi.org/10.1016/j.marpolbul.2017.11.022.	2018	Community bottles	Once								NA		y
	Lavers, J. L. et al. https://doi.org/10.1038/s41598-019-43375-4.	2019	Field survey	Once	7 Isl. (25 Beaches)	30m*6m+ 2m wide strand line, 10m veg			surface, buried 10 cm.			NA		y	y	y	y	y			y	y				Shoes, cigarettes, lighters, tooth brush
China	Fok L, & Cheung PK. https://doi.org/10.1016/j.marpolbul.2015.07.050	2015	Field survey	wet season	25 Beaches	30 m strand line	0.25 m2	strand line	4 cm		Seawater	0.315-5mm		y		y					y
	Zhang W, et al. http://dx.doi.org/10.1016/j.marpolbul.2015.08.002	2015	Field survey	Once	2 Beaches	n=90 pellets		water to avg strand			PHA	NA	NA
	Zhao S,et al. http://dx.doi.org/10.1016/j.rsma.2015.04.001	2015	Field survey	Once	6 Beaches	100 m	0.25m2	strand	5 cm		odium poly-	1-20 mm	RAMAN	y	y	y												y			y	y	coloured
	Zhou C, et al. http://dx.doi.org/10.7508/GJESM.2015.04.005	2015	Field survey	Once						y	tungstate	NA		y			y				y	y	y			cigarettes, shoes
	Cheung PK, et al. http://dx.doi.org/10.1016/j.scitotenv.2016.04.048	2016	Field survey	wet and dry season, west/east coast,	25 Beaches	4 * 30 m transects	0.25 m2		4 cm	y	Seawater	0.315–5mm	FTIR	y		y
	Yu X, et al. http://dx.doi.org/10.1016/j.envpol.2016.04.080	2016	Field survey	Once	3 Beach	5 samples per location	25 cm diameter ring	High and low water	2 cm		NaCl	NA	FTIR
	Li J, et al. https://doi.org/10.1016/j.marpolbul.2018.09.025	2018	Field survey	12* monthly		5	0.3*0.3 quadrat		500/100g sediment			0.16-5mm	FTIR	y		y						y					y		y	y		y	y
United Kingdom	Caulton, E., et al. https://doi.org/10.1016/0025-326X(87)90622-9	1987	Field survey	7 monthly		300 m transect + belt transect					Tap water	NA		y	y		y	y	y			y	y
	Rees G, & Pond K. https://doi.org/10.1016/0025-326X(94)00192-C	1995	Review									NA	NA
	Browne, M.A., et al. https://doi.org/10.1021/es903784e	2010	Field survey	Once		50 m transect, 5 replicates	0.25 m2	strand			NaCl	<1 mm uwards	FTIR
	Holmes, L.A. et al. https://doi.org/10.1016/j.envpol.2011.08.052	2012	Pellets	100 pellets	4 Beaches							NA				y
	Quilliam, R.S. et al. https://doi.org/10.1016/j.marpolbul.2014.05.011	2014	Field survey	Once	1 Beach	2 * 40 m transects	40 m	from water, parallel				NA	NA
	Williams, A.T. et al., https://doi.org/10.1016/j.marpolbul.2014.05.017	2014	Grading system	2000 & 2012	445 Beaches		50 m	Strand to veg				NA	NA
	Unger, A., & Harrison, N. https://doi.org/10.1016/j.marpolbul.2016.04.024	2016	Community	1999-2007								categories		y	y					y			y			many categories
	Blumenroder, J., et al. https://dx.doi.org/10.1016/j.marpolbul.2017.07.009	2017	Field survey	Once	Isl., 13 sites				5 mL sediment		NaCl	NA	FTIR														y	y	y	y	y	n	y
	Nelms, S.E. et al. https://doi.org/10.1016/j.scitotenv.2016.11.137	2017	Community	2005-2014								NA		y	y						y	y				many categories
	Turner, A. https://doi.org/10.1016/j.envpol.2016.11.034	2017	Field survey	Once	2 high energy Beaches		50 m	strand				NA	FTIR, XRF analysis
	Turrell, W.M. https://doi.org/10.1016/j.marpolbul.2018.10.024	2018	Model									NA	NA
	Rodrigues A., et al. https://doi.org/10.1016/j.marpolbul.2019.01.011	2019	Pellets	Once	5 sites		1 m2	high tide line	5 cm			NA	NA
	Turner, A.et al. https://doi.org/10.1016/j.scitotenv.2019.01.281	2019	Pellets	Once	17 Beaches							NA	FTIR, XRF analysis
	Turrell, W.R. https://doi.org/10.1016/j.marpolbul.2019.04.009	2019	Community	Once								NA		y			y			y			y	y
